1 Gut microbiota features associated with *Clostridioides*  
2 *difficile* colonization in dairy calves

3  
4 Laurel E. Redding<sup>1</sup>, Alexander S. Berry<sup>2,3</sup>, Nagaraju Indugu<sup>1</sup>, Elizabeth Huang<sup>1</sup>, Daniel P. Beiting<sup>3</sup>, Dipti  
5 Pitta<sup>1</sup>

6  
7  
8 <sup>1</sup>Department of Clinical Sciences, University of Pennsylvania, School of Veterinary Medicine, Kennett  
9 Square, PA, USA

10  
11 <sup>2</sup>Division of Gastroenterology, Hepatology, and Nutrition, Children’s Hospital of Philadelphia, Philadelphia,  
12 PA, USA

13  
14 <sup>3</sup>Department of Pathobiology, School of Veterinary Medicine, University of Pennsylvania, Philadelphia, PA,  
15 USA

16  
17  
18 Corresponding author: Laurel Redding, [lredding@vet.upenn.edu](mailto:lredding@vet.upenn.edu)

19

## 20 Abstract

21 Diarrheal disease, a major cause of morbidity and mortality in dairy calves, is strongly associated with the  
22 health and composition of the gut microbiome. *Clostridioides difficile* is an opportunistic pathogen that  
23 proliferates and can produce enterotoxins when the host experiences gut dysbiosis. However, even  
24 asymptomatic colonization with *C. difficile* can be associated with differing degrees of microbiome  
25 disruption in a range of species, including people, swine, and dogs. Little is known about the interaction  
26 between *C. difficile* and the gut microbiome in dairy calves. In this study, we sought to define microbial  
27 features associated with *C. difficile* colonization in pre-weaned dairy calves less than 2 weeks of age. We  
28 characterized the fecal microbiota of 80 calves from 23 different farms using 16S rRNA sequencing and  
29 compared the microbiota of *C. difficile*-positive (n=24) and *C. difficile*-negative calves (n=56). Farm  
30 appeared to be the greatest source of variability in the gut microbiota. When controlling for calf age, diet,  
31 and farm location, there was no significant difference in Shannon alpha diversity ( $P=0.50$ ) or in weighted  
32 UniFrac beta diversity ( $P=0.19$ ) between *C. difficile*-positive and -negative calves. However, there was a  
33 significant difference in beta diversity as assessed using Bray-Curtiss diversity ( $P=0.0077$ ), and *C. difficile*-  
34 positive calves had significantly increased levels of *Ruminococcus (gnavus group)* (Adj.  $P=0.052$ ),  
35 *Lachnospirillum* (Adj.  $P=0.060$ ), *Butyrivibrio* (Adj.  $P=0.060$ ), and *Clostridium sensu stricto 2* compared  
36 to *C. difficile*-negative calves. Additionally, *C. difficile*-positive calves had fewer microbial co-occurrences  
37 than *C. difficile*-negative calves, indicating reduced bacterial synergies. Thus, while *C. difficile* colonization  
38 alone is not associated with dysbiosis and is therefore unlikely to result in an increased likelihood of  
39 diarrhea in dairy calves, it may be associated with a more disrupted microbiota.

40

## 41 Introduction

42 Infectious diarrheal disease is one of the main causes of mortality in dairy calves (1, 2), and calves  
43 less than 30 days of age are at highest risk of developing diarrhea (3, 4). Studies have shown that gut  
44 microbial composition is associated with gut health and the likelihood of diarrhea: reductions in microbial  
45 diversity are associated with an increased incidence of diarrhea (5), and the colonization of the calf gut  
46 with beneficial bacteria along with the decreased colonization of potential pathogens decreases the  
47 likelihood of calf diarrhea (6).

48 *Clostridioides difficile* is a spore-forming anaerobic, gram-positive bacillus that is a significant  
49 enteric pathogen in many species of animals. Colonization with *C. difficile* has been shown to be  
50 associated with reduced gut microbial diversity and increased colonization of pathogenic bacteria in  
51 people (7, 8), and we recently demonstrated a similar association in puppies (9). Dairy calves, like the  
52 neonates of other species, are colonized with *C. difficile* at high rates, with reported prevalences ranging  
53 from 28-56% (10, 11). While there is some evidence that infection with *C. difficile* can result in diarrhea in  
54 calves (12), the effect of the asymptomatic colonization of calves on the gut microbiome is unknown.  
55 Given the crucial role of the gut microbiome in providing colonization resistance against pathogens that  
56 cause diarrhea (13, 14), a better understanding of the effect of pathogens such as *C. difficile* on the calf  
57 gut microbiome is needed. The goal of this study was thus to define the gut microbiota features  
58 associated with *C. difficile* colonization in dairy calves and to define the effects of calf age, diet, and farm  
59 on the risk of colonization.

60

## 61 Methods

62 Sample collection: Fecal samples were manually collected from up to five randomly selected healthy  
63 calves less than two weeks of age from each of 23 dairy farms in Pennsylvania, Maryland and Delaware.

64 This study was approved by the Institutional Animal Care and Use Committee of the University of  
65 Pennsylvania.

66

67 Detection of *C. difficile*:

68 Individual fecal samples were tested for *C. difficile* using the Xpert *C. difficile* assay (Xpert CD  
69 assay; Cepheid, Sunnyvale, CA, USA) according to the manufacturer's instructions. This assay detects the  
70 cytotoxin gene (*tcdB*) and binary toxin genes (*cdtA* and *cdtB*). Additionally, the assay has a callout for  
71 ribotype NAP1/B1/027.

72 To rule out the possibility of colonization with non-toxigenic *C. difficile*, pooled fecal samples from  
73 each farm were also submitted for anaerobic culture. Briefly, 0.5 g of formed fecal sample was mixed with  
74 0.5 ml of 100% ethanol. The mixture remained for 60 minutes at room temperature before being  
75 inoculated on Cycloserine-cefoxitin fructose modified agar (CCFA) (Remel™) or *Clostridium difficile*  
76 Selective Agar (BBL™) and Columbia CNA agar (Thermo Fisher Scientific Remel Products). Inoculated  
77 plates and broth were incubated in BD Gas-Pak™ EZ container systems with BD BBL™ CO2 generators and  
78 BD BBL™ Gas Pak™ anaerobic CO2 indicators (Franklin Lakes, NJ) at 36°C ± 2°C under anaerobic growth  
79 conditions for seven days and checked for growth every other day. Suspect colonies were identified and  
80 isolated. Isolates were confirmed to be *C. difficile* by Maldi-TOF identification and/or RapID ANA II System  
81 (Thermo Fisher Scientific Remel Products).

82

83 16S rRNA sequencing

84 DNA was extracted from fecal samples using Qiagen PowerSoil DNA extraction kit. 16S rRNA sequencing  
85 was performed as described previously (9, 15). Briefly, the V4 region of the 16S rRNA gene was amplified  
86 using PCR, which was performed using Accuprime Pfx Supermix and custom primers for 30 cycles (15).  
87 PicoGreen quantification was used to normalize post-PCR products and AMPureXP beads were used to

88 clean the combined pools. Libraries were quantified and sized using a Qubit 2.0 and TapeStation 4200,  
89 respectively. 250bp paired-end sequencing was performed using an Illumina MiSeq.

90

#### 91 Sequence data processing using QIIME2

92 The QIIME2 pipeline (16) was used to process and analyze 16S sequencing data. Samples were  
93 demultiplexed using q2-demux and denoised using Dada2 (17). Sequences were aligned using mafft (18)  
94 and phylogenetic trees were reconstructed using fasttree (19). Shannon alpha diversity, weighted UniFrac  
95 and Bray-Curtis beta diversity metrics were estimated using q2-core-metrics-diversity after samples were  
96 rarefied to 1941 reads per sample, and p-values were adjusted for multiple hypothesis testing using  
97 Benjamini-Hochberg (B-H) false discovery rate (FDR) corrections (20). Taxonomy was assigned to  
98 sequences using q2-feature-classifier classify-sklearn (21) against the Silva reference database (22). Taxa  
99 were collapsed to the genus level, when possible. OTUs with less than 1% average relative abundance  
100 across all samples were removed.

101

#### 102 Correlation analysis and differential feature selection

103 The correlation between *C. difficile* culture status and Shannon alpha diversity was determined  
104 using a linear mixed effects model as implemented in the lme4 package (23) in R where age was  
105 controlled for as a fixed effect and with farm and diet as random effects. The correlation between *C.*  
106 *difficile* culture status on gut microbiota beta diversity was determined using PERMANOVA as  
107 implemented in the vegan package (24) in R controlling for age, farm, and diet. Principal coordinate  
108 analyses were performed using the phyloseq package in R (25). Differentially-abundant taxa were  
109 determined using LDA Effect Size (LEfSe) (26) and Analysis of Composition of microbiomes (ANCOM), and  
110 p-values were adjusted for multiple hypothesis testing using B-H FDR corrections in R. The Dice index (27)

111 was used to determine the co-occurrence of bacterial genera. Boxplots and LEfSe plots were visualized  
112 using ggplot2 (28) and ggthemes.

113

## 114 Results:

### 115 Subject characteristics and *C. difficile* status

116 Fecal samples were collected from a total of 92 Holstein calves from 23 farms. All calves appeared  
117 systemically healthy at the time of sampling and none had received antimicrobial therapy. The mean (SD)  
118 age of the calves was 7.0 (5.0) days. Thirty-six (35.6%) calves were fed waste milk, while the remaining  
119 calves were fed either colostrum or whole milk.

120 *C. difficile* was detected by qPCR in 28 calves (30.4%, 95% CI 21.2-40.9%) (**Fig. 1**). Of the 28  
121 samples that were positive for *C. difficile* on qPCR, 1 (3.6%) was positive for Toxin B only, 14 (50%) were  
122 positive for binary toxin only, and 13 (46.4%) were positive for both Toxin B and the binary toxin. None of  
123 the organisms were identified as the NAP1/B1/027 ribotype. On 14 farms, there were both *C. difficile*-  
124 positive and *C. difficile*-negative calves, whereas on the remaining farms, all of the calves were *C. difficile*-  
125 negative. There were no farms where all samples were qPCR-negative but the pooled sample was culture-  
126 positive. Neither calf age nor feeding of waste milk were significantly associated with the likelihood of  
127 detecting *C. difficile* among the calves (OR=1.01, p=0.805 and OR=0.71, p=0.493, respectively) (**Fig. 1**).

128

### 129 Effect of *C. difficile* status on microbiota diversity

130 Microbiota community structure of 87 calf fecal samples was assessed by sequencing and analyzing the  
131 V4 region of the 16S rRNA gene. Three samples were dropped from subsequent analyses because of low  
132 coverage and four additional samples were dropped because there was not enough sample for qPCR

133 analysis. Among the 80 remaining samples, 24 were positive for *C. difficile* by qPCR and 56 were negative  
134 (Fig 1).

135 The relationship between *C. difficile* infection and microbial diversity of the gut microbiota was  
136 assessed. Since calves ranged in age, diet, and farm location, a linear mixed effects model was performed  
137 to assess the relationship between *C. difficile* infection and alpha diversity by setting age as a fixed  
138 variable and farm and feeding type as random-effect variables. The association between *C. difficile* status  
139 and Shannon alpha diversity was not significant ( $P=0.50$ ) as determined by ANOVA when controlling for  
140 age, diet, and farm location (Fig. 2). PERMANOVA was then used to test associations between *C. difficile*  
141 infection status and beta diversity of the gut microbiome. Farm location alone explained most of the  
142 variation in gut microbiota composition across samples using both Bray-Curtis ( $P=1e-4$ ;  $R^2=0.43$ ) and  
143 weighted UniFrac ( $P=1e-4$ ;  $R^2=0.46$ ) beta diversity metrics (Fig. 3, Fig. 4). Age and diet were not  
144 significantly associated with gut microbiota composition after controlling for farm ( $P>0.1$ ). After  
145 controlling for farm, age, and diet, *C. difficile* status was significantly associated with Bray-Curtis beta  
146 diversity ( $P=0.0077$ ;  $R^2=0.023$ ), explaining 2.3% of the variation in gut microbiota composition. *C. difficile*  
147 status was not significantly associated with weighted UniFrac beta diversity ( $P=0.1934$ ;  $R^2=0.013$ ) after  
148 controlling for farm, age, and diet (Fig. 3). Some clustering by farm and by *C. difficile* status within farms  
149 was apparent on principal coordinate analysis (Fig. 4).

150

#### 151 Bacterial community composition

152 Since *C. difficile* status was associated with differences in gut microbiota composition as  
153 determined by beta diversity, we next sought to determine the specific bacterial taxa associated with *C.*  
154 *difficile* infection. At the phylum level, there were no significant differences between bacterial  
155 communities in *C. difficile*-positive and -negative samples (Fig. 5). The Firmicutes phylum predominated

156 (57.1% in *C. difficile*-positive samples and 51.4% in *C. difficile*-negative samples), followed by  
157 Proteobacteria (17.1% and 24.3%), Bacteroides (16.7% and 11.5%), and Actinobacteria (8.1% and 9.7%).

158 At the genus level, the only significant difference between *C. difficile*-positive and -negative  
159 samples by ANCOM occurred for Clostridioides. When considering LEfSe analysis, there were four taxa  
160 among the 19 taxa with average relative abundance greater than 1% that were statistically significantly  
161 (*Adj. P*<0.1) associated with *C. difficile* status. *Ruminococcus (gnavus group)* (*Adj. P*=0.052),  
162 *Lachnoclostridium* (*Adj. P*=0.060), *Butyricoccus* (*Adj. P*=0.060), and *Clostridium (sensu stricto 2)* (*Adj.*  
163 *P*=0.064) were all found in higher abundance among *C. difficile*-positive calves than in *C. difficile*-negative  
164 calves (**Fig. 6**). While not statistically significantly different among the two groups, levels of *Lactobacillus*,  
165 *Megasphaera*, and *Streptococcus* were increased in *C. difficile*-positive samples, while levels of *Blautia*,  
166 *Fusobacterium*, *Tyzzereella*, *Enterobacteriaceae*, *Fecalibacterium*, *Dorea*, and *Collinsella* were decreased.

167 Because microbes work synergistically in the gut, we sought to determine the associative  
168 interactions between bacteria using a co-occurrence analysis based on the Dice index. When considering  
169 all levels of abundance, more co-occurrence of bacterial taxa appeared in the *C. difficile*-negative  
170 samples, with 1,488 (65.5%) highly (correlation coefficient>0.6) and significantly (*p*<0.01) correlated  
171 genera pairs. Most co-occurrences were among members of the Firmicutes phylum (1295, 55.0%).  
172 However, members of Firmicutes also showed high co-occurrence with Actinobacteria and Bacteroidetes.  
173 In the *C. difficile*-positive samples, there were fewer highly co-occurring genera, with 830 (73.3%) highly  
174 and significantly correlated genera pairs. When only considering taxa with levels of abundance greater  
175 than 1%, there were no significant differences in co-occurrence patterns (**Fig. 7**).

176

177 **Discussion:**



178 In this study, we characterized microbial features associated with asymptomatic *C. difficile* colonization in  
179 dairy calves. While the role of *C. difficile* in calf diarrhea remains equivocal (12), exploring the association  
180 between this pathogen and the gut microbiome is important for understanding factors that affect gut  
181 health and enteric diseases. While a number of studies have examined the epidemiology of *C. difficile* in  
182 animals of veterinary importance, the association between the microbiome and *C. difficile* is only  
183 beginning to be explored in dogs (9), horses (29), and pigs (30). Notably, in pigs, the presence of *C.*  
184 *difficile* is associated with significantly reduced microbial diversity and increased levels of  
185 enteropathogens associated with neonatal diarrhea (30).

186 Unsurprisingly, as in other studies (31-33), we found that the farm was the source of most of the  
187 variation in gut microbiota composition. However, even among calves from the same farm, there was  
188 variability in both *C. difficile* colonization status and gut microbial diversity, suggesting, as have other  
189 studies (32, 34), that the farm environment is only one of many competing influencers of the developing  
190 calf gut microbiome. Neither diet nor age were significantly associated with microbiome composition  
191 when controlling for farm, but this is almost certainly due to the small sample size within each farm and  
192 the lack of within-farm variability in factors such as diet. When controlling for age, diet, and farm, we  
193 noted a significant difference in beta diversity between *C. difficile*-positive and *C. difficile*-negative fecal  
194 samples when considering the Bray-Curtis metric but not the unweighted UniFrac metric. While both of  
195 these metrics are weighted by abundance, the latter metric weighs diversity by phylogenetic relationship.  
196 Thus the lack of a significant difference when considering the weighted UniFrac metric suggests that,  
197 while there may be a significant difference in the composition of microbial communities, the  
198 differentially-abundant microbes might be closely related to one another. Indeed, all four genera  
199 identified as differentially-abundant by LEfSe are members of the *Clostridia* class, with two belonging to  
200 the *Clostrideaceae* family.

201

202           While the lack of a consistent difference in alpha and beta diversity between *C. difficile*-positive  
203 and *C. difficile*-negative samples suggests that the effect of *C. difficile* colonization on the gut microbiome  
204 of calves is minimal, other findings suggest that *C. difficile* colonization is associated with a more  
205 disrupted – but not dysbiotic – gut microbiome. *C. difficile* colonization was preferentially associated with  
206 certain bacterial taxa of the class *Clostridia* that do have associations with dysbiosis. Notably, the  
207 overrepresentation of *Ruminococcus gnavus* and *Lachnospiridia* in *C. difficile*-positive calves point to the  
208 possibility of an underlying imbalance in the gut microbiome. *R. gnavus*, a Gram-positive anaerobe that is  
209 typically found in the gut of over 90% of healthy people at abundances less than 0.1%, has been robustly  
210 associated with inflammatory dysbiotic conditions such as Crohn’s disease (35-37), allergic airway disease  
211 (38), eczema (39), and spondyloarthritis (40). Dramatic blooms of *R. gnavus* occur in patients  
212 experiencing flares of inflammatory bowel disease, with abundance levels that can peak at 69% of the gut  
213 microbiota (37). Notably, this association appears to occur across species, as the gut microbiomes of both  
214 infants (7) and piglets (30) colonized with *C. difficile* also had increased levels of *Ruminococcus* species,  
215 including *R. gnavus*. Additionally, *Ruminococcus* was one of six bacterial genera in the gut microbiome  
216 that predicted the occurrence of diarrhea in calves in another study (41). The increased relative  
217 abundance of *Clostridium sensu stricto* and *Lachnospiridia* in *C. difficile*-positive calves also points to the  
218 possibility of a less healthy gut environment. An increased relative abundance of *Clostridium sensu stricto*,  
219 which was also found in *C. difficile*-positive piglets (30), was associated with food allergies in infants (42)  
220 and diarrhea in piglets (43). A tentative association between increased levels of *Lachnospiridia* and  
221 neoplasia of the gastrointestinal tract has been identified in people (44, 45). While no such association  
222 has been explored in animals, the overrepresentation of this taxon in *C. difficile*-positive calves may be  
223 the result of a more disrupted gut microbiota. However, it is also important to note that the increased  
224 relative abundance of these taxa were only detected using LEfSe analysis and not ANCOM, which suggests  
225 that the association is likely relatively weak.

226 Certain bacterial taxa that predominate in healthy calves were found at lower (but not  
227 statistically significantly lower) levels in *C. difficile*-positive calves. Notably, *Fecalibacterium*, *Dorea*,  
228 *Enterobacteriaceae* and *Collinsella* are among the most abundant genera in healthy pre-weaned calves  
229 (46-49), and some of these taxa provide colonization resistance against *C. difficile* (8, 50). Their decreased  
230 relative abundance in *C. difficile*-positive calves is thus also reflective of a more disrupted gut  
231 microbiome. The decreased co-occurrence of bacterial taxa in *C. difficile*-positive calves compared to *C.*  
232 *difficile*-negative calves when considering all levels of abundance may also corroborate the notion of a  
233 slightly more disrupted gut microbiome in colonized calves. However, because the difference occurred  
234 only in rare taxa (abundance < 1%), this difference appears unlikely to result in dysbiosis.

235 One finding that is in contradiction to the general trend of *C. difficile* colonization being  
236 associated with disrupted microbiota is the increased abundance of *Butyricoccus* in *C. difficile*-positive  
237 calves. In people, *Butyricoccus* species of bacteria are generally found in *lower* levels in people colonized  
238 with *C. difficile* (51) or diagnosed with inflammatory bowel disease (52, 53), and at higher levels in healthy  
239 dairy calves compared to calves with diarrhea (48, 54). It is unclear why they were found at higher levels  
240 in *C. difficile*-positive calves compared to *C. difficile*-negative calves. *Butyricoccus* bacteria produce  
241 butyrate, an important nutrient source for gut colonocytes and a beneficial driver of the immunological  
242 maturation of the gut mucosa (55), and account for one of the most abundant genera in dairy calves 7  
243 days after birth (56). The differential levels in calves compared to people with enteric disease may be due  
244 to species-specific patterns of development of the neonatal gut. Species-specific differences may also  
245 explain why *C. difficile* colonized calves had higher levels of *Clostridial* genera but colonized puppies had  
246 lower levels (9). While rumen development is minimal in pre-weaned calves, they are nevertheless  
247 ruminants and thus have fundamentally different enteric physiologies and microbial ecologies compared  
248 to true monogastric species.

249           Some limitations apply to this study. Heterogeneity in farm location, age, and diet across all of the  
250 sampled calves may have obscured features of the microbiome that would otherwise have been  
251 associated with *C. difficile* colonization. The cross-sectional nature of the study also precludes the  
252 possibility of drawing any conclusions about the duration of colonization and its effect on an already  
253 rapidly evolving gut microbiome. Finally, because we used qPCR to detect *C. difficile* in the calves' feces,  
254 we were unable to detect non-toxigenic *C. difficile*. It is likely that toxigenic and non-toxigenic *C. difficile*  
255 occupy a similar ecological niche and compete for similar resources within the gut microbiota; thus the  
256 presence of non-toxigenic *C. difficile* could account for the lack of a significant difference in alpha  
257 diversity and microbial composition between *C. difficile*-positive and *C. difficile*-negative calves. However,  
258 we believe this possibility to be unlikely, as there were no samples that were negative on qPCR but came  
259 from a farm where the pooled sample was positive for *C. difficile* on anaerobic culture.

260

## 261 **Conclusion**

262 The greatest source of variability in the calf microbiome was the farm, and there were few or no  
263 statistically significant differences in alpha or beta diversity between *C. difficile*-positive and *C. difficile*-  
264 negative calves. *C. difficile* colonization thus does not appear to be associated with dysbiosis or with  
265 increased levels of enteropathogens that cause calf diarrhea. However, microbial community signatures –  
266 including increased relative abundance of bacterial taxa that have been associated with dysbiotic  
267 states in other species and in people - suggest that the microbiota of *C. difficile*-colonized calves is more  
268 disrupted than that of non-colonized calves.

269

270 REFERENCES  
271

- 272 1. McGuirk SM. Disease management of dairy calves and heifers. *Vet Clin North Am Food Anim*  
273 *Pract.* 2008 Mar;24(1):139-53. PubMed PMID: 18299036.
- 274 2. Foster DM, Smith GW. Pathophysiology of diarrhea in calves. *Vet Clin North Am Food Anim*  
275 *Pract.* 2009 Mar;25(1):13-36, xi. PubMed PMID: 19174281.
- 276 3. Virtala AM, Mechor GD, Grohn YT, Erb HN. Morbidity from nonrespiratory diseases and  
277 mortality in dairy heifers during the first three months of life. *Journal of the American Veterinary*  
278 *Medical Association.* 1996 Jun 15;208(12):2043-6. PubMed PMID: 8707681.
- 279 4. Gulliksen SM, Jor E, Lie KI, Hamnes IS, Loken T, Akerstedt J, et al. Enteropathogens and risk  
280 factors for diarrhea in Norwegian dairy calves. *J Dairy Sci.* 2009 Oct;92(10):5057-66. PubMed PMID:  
281 19762824.
- 282 5. Oikonomou G, Teixeira AG, Foditsch C, Bicalho ML, Machado VS, Bicalho RC. Fecal microbial  
283 diversity in pre-weaned dairy calves as described by pyrosequencing of metagenomic 16S rDNA.  
284 Associations of Faecalibacterium species with health and growth. *PloS one.* 2013;8(4):e63157. PubMed  
285 PMID: 23646192. Pubmed Central PMCID: 3639981.
- 286 6. Malmuthuge N, Chen Y, Liang G, Goonewardene LA, Guan le L. Heat-treated colostrum feeding  
287 promotes beneficial bacteria colonization in the small intestine of neonatal calves. *J Dairy Sci.* 2015  
288 Nov;98(11):8044-53. PubMed PMID: 26342981.
- 289 7. Rousseau C, Levenez F, Fouqueray C, Dore J, Collignon A, Lepage P. Clostridium difficile  
290 colonization in early infancy is accompanied by changes in intestinal microbiota composition. *J Clin*  
291 *Microbiol.* 2011 Mar;49(3):858-65. PubMed PMID: 21177896. Pubmed Central PMCID: PMC3067754.
- 292 8. Zhang L, Dong D, Jiang C, Li Z, Wang X, Peng Y. Insight into alteration of gut microbiota in  
293 Clostridium difficile infection and asymptomatic C. difficile colonization. *Anaerobe.* 2015 Aug;34:1-7.  
294 PubMed PMID: 25817005.
- 295 9. Berry ASF, Kelly BJ, Barnhart D, Kelly DJ, Beiting DP, Baldassano RN, et al. Gut microbiota  
296 features associated with Clostridioides difficile colonization in puppies. *PloS one.* 2019;14(8):e0215497.  
297 PubMed PMID: 31469837. Pubmed Central PMCID: PMC6716646.
- 298 10. Houser BA, Soehnlen MK, Wolfgang DR, Lyszczek HR, Burns CM, Jayarao BM. Prevalence of  
299 Clostridium difficile toxin genes in the feces of veal calves and incidence of ground veal contamination.  
300 *Foodborne Pathog Dis.* 2012 Jan;9(1):32-6. PubMed PMID: 21988399.
- 301 11. Knight DR, Thean S, Putsathit P, Fenwick S, Riley TV. Cross-sectional study reveals high  
302 prevalence of Clostridium difficile non-PCR ribotype 078 strains in Australian veal calves at slaughter.  
303 *Appl Environ Microbiol.* 2013 Apr;79(8):2630-5. PubMed PMID: 23396338. Pubmed Central PMCID:  
304 3623178.

- 305 12. Hammitt MC, Bueschel DM, Keel MK, Glock RD, Cuneo P, DeYoung DW, et al. A possible role for  
306 *Clostridium difficile* in the etiology of calf enteritis. *Veterinary microbiology*. 2008 Mar 18;127(3-4):343-  
307 52. PubMed PMID: 17964088.
- 308 13. Malmuthuge N, Griebel PJ, Guan le L. The Gut Microbiome and Its Potential Role in the  
309 Development and Function of Newborn Calf Gastrointestinal Tract. *Front Vet Sci*. 2015;2:36. PubMed  
310 PMID: 26664965. Pubmed Central PMCID: PMC4672224.
- 311 14. Malmuthuge N, Guan LL. Understanding the gut microbiome of dairy calves: Opportunities to  
312 improve early-life gut health. *J Dairy Sci*. 2017 Jul;100(7):5996-6005. PubMed PMID: 28501408.
- 313 15. Kozich JJ, Westcott SL, Baxter NT, Highlander SK, Schloss PD. Development of a dual-index  
314 sequencing strategy and curation pipeline for analyzing amplicon sequence data on the MiSeq Illumina  
315 sequencing platform. *Appl Environ Microbiol*. 2013 Sep;79(17):5112-20. PubMed PMID: 23793624.  
316 Pubmed Central PMCID: PMC3753973.
- 317 16. Bolyen E, Rideout JR, Dillon MR, Bokulich NA, Abnet CC, Al-Ghalith GA, et al. Reproducible,  
318 interactive, scalable and extensible microbiome data science using QIIME 2. *Nature Biotechnology*. 2019  
319 2019/08/01;37(8):852-7.
- 320 17. Callahan BJ, McMurdie PJ, Rosen MJ, Han AW, Johnson AJ, Holmes SP. DADA2: High-resolution  
321 sample inference from Illumina amplicon data. *Nat Methods*. 2016 Jul;13(7):581-3. PubMed PMID:  
322 27214047. Pubmed Central PMCID: 4927377.
- 323 18. Katoh K, Standley DM. MAFFT multiple sequence alignment software version 7: improvements  
324 in performance and usability. *Mol Biol Evol*. 2013 Apr;30(4):772-80. PubMed PMID: 23329690. Pubmed  
325 Central PMCID: PMC3603318.
- 326 19. Price MN, Dehal PS, Arkin AP. FastTree 2--approximately maximum-likelihood trees for large  
327 alignments. *PloS one*. 2010 Mar 10;5(3):e9490. PubMed PMID: 20224823. Pubmed Central PMCID:  
328 2835736.
- 329 20. Benjamini Y, Hochberg Y. Controlling the False Discovery Rate: A Practical and Powerful  
330 Approach to Multiple Testing. *Journal of the Royal Statistical Society Series B (Methodological)*.  
331 1995;57(1):289-300.
- 332 21. Bokulich NA, Kaehler BD, Rideout JR, Dillon M, Bolyen E, Knight R, et al. Optimizing taxonomic  
333 classification of marker-gene amplicon sequences with QIIME 2's q2-feature-classifier plugin.  
334 *Microbiome*. 2018 2018/05/17;6(1):90.
- 335 22. Quast C, Pruesse E, Yilmaz P, Gerken J, Schweer T, Yarza P, et al. The SILVA ribosomal RNA gene  
336 database project: improved data processing and web-based tools. *Nucleic Acids Res*. 2013;41(Database  
337 issue):D590-D6. PubMed PMID: 23193283. Epub 11/28. eng.
- 338 23. Bates D, Maechler M, Bolker B, Walker S. Fitting Linear Mixed-Effects Models Using lme4.  
339 *Journal of Statistical Software*. 2015;67(1):1-48.

- 340 24. Oksanen J, Blanchet F, Kindt R. Package, "vegan". 2015.
- 341 25. McMurdie PJ, Holmes S. phyloseq: an R package for reproducible interactive analysis and  
342 graphics of microbiome census data. *PloS one*. 2013;8(4):e61217. PubMed PMID: 23630581. Pubmed  
343 Central PMCID: PMC3632530.
- 344 26. Segata N, Izard J, Waldron L, Gevers D, Miropolsky L, Garrett WS, et al. Metagenomic biomarker  
345 discovery and explanation. *Genome Biology*. 2011 2011/06/24;12(6):R60.
- 346 27. Dice LR. Measures of the Amount of Ecologic Association Between Species. *Ecology*.  
347 1945;26(3):297-302.
- 348 28. Wickham H. *ggplot2: Elegant Graphics for Data Analysis*. New York, NY: Springer-Verlag; 2016.
- 349 29. Schoster A, Kunz T, Lauper M, Graubner C, Schmitt S, Weese JS. Prevalence of *Clostridium*  
350 *difficile* and *Clostridium perfringens* in Swiss horses with and without gastrointestinal disease and  
351 microbiota composition in relation to *Clostridium difficile* shedding. *Veterinary microbiology*. 2019  
352 Dec;239:108433. PubMed PMID: 31767096.
- 353 30. Grześkowiak Ł, Dadi TH, Zentek J, Vahjen W. Developing Gut Microbiota Exerts Colonisation  
354 Resistance to *Clostridium* (syn. *Clostridioides*) *difficile* in Piglets. *Microorganisms*. 2019 Jul 26;7(8).  
355 PubMed PMID: 31357520. Pubmed Central PMCID: PMC6723027. Epub 2019/07/31. eng.
- 356 31. O'Hara E, Kenny DA, McGovern E, Byrne CJ, McCabe MS, Guan LL, et al. Investigating temporal  
357 microbial dynamics in the rumen of beef calves raised on two farms during early life. *FEMS Microbiology*  
358 *Ecology*. 2020;96(2).
- 359 32. Haley BJ, Kim S-W, Salaheen S, Hovingh E, Van Kessel JAS. Differences in the Microbial  
360 Community and Resistome Structures of Feces from Preweaned Calves and Lactating Dairy Cows in  
361 Commercial Dairy Herds. *Foodborne Pathogens and Disease*. 2020 2020/08/01;17(8):494-503.
- 362 33. Gomez DE, Arroyo LG, Costa MC, Viel L, Weese JS. Characterization of the Fecal Bacterial  
363 Microbiota of Healthy and Diarrheic Dairy Calves. *J Vet Intern Med*. 2017;31(3):928-39. PubMed PMID:  
364 28390070. Epub 04/07. eng.
- 365 34. Dill-McFarland KA, Breaker JD, Suen G. Microbial succession in the gastrointestinal tract of dairy  
366 cows from 2 weeks to first lactation. *Sci Rep*. 2017;7:40864-. PubMed PMID: 28098248. eng.
- 367 35. Henke MT, Kenny DJ, Cassilly CD, Vlamakis H, Xavier RJ, Clardy J. *Ruminococcus gnavus*, a  
368 member of the human gut microbiome associated with Crohn's disease, produces an inflammatory  
369 polysaccharide. *Proceedings of the National Academy of Sciences*. 2019;116(26):12672.
- 370 36. Joossens M, Huys G, Cnockaert M, De Preter V, Verbeke K, Rutgeerts P, et al. Dysbiosis of the  
371 faecal microbiota in patients with Crohn's disease and their unaffected relatives. *Gut*. 2011  
372 May;60(5):631-7. PubMed PMID: 21209126. Epub 2011/01/07. eng.



- 373 37. Hall AB, Yassour M, Sauk J, Garner A, Jiang X, Arthur T, et al. A novel Ruminococcus gnavus clade  
374 enriched in inflammatory bowel disease patients. *Genome Medicine*. 2017 2017/11/28;9(1):103.
- 375 38. Chua H-H, Chou H-C, Tung Y-L, Chiang B-L, Liao C-C, Liu H-H, et al. Intestinal Dysbiosis Featuring  
376 Abundance of Ruminococcus gnavus Associates With Allergic Diseases in Infants. *Gastroenterology*.  
377 2018 2018/01/01/;154(1):154-67.
- 378 39. Zheng H, Liang H, Wang Y, Miao M, Shi T, Yang F, et al. Altered Gut Microbiota Composition  
379 Associated with Eczema in Infants. *PloS one*. 2016;11(11):e0166026. PubMed PMID: 27812181. Pubmed  
380 Central PMCID: PMC5094743. Epub 2016/11/05. eng.
- 381 40. Breban M, Tap J, Leboime A, Said-Nahal R, Langella P, Chiocchia G, et al. Faecal microbiota study  
382 reveals specific dysbiosis in spondyloarthritis. *Annals of the rheumatic diseases*. 2017 Sep;76(9):1614-22.  
383 PubMed PMID: 28606969. Epub 2017/06/14. eng.
- 384 41. Ma T, Villot C, Renaud D, Skidmore A, Chevaux E, Steele M, et al. Linking perturbations to  
385 temporal changes in diversity, stability, and compositions of neonatal calf gut microbiota: prediction of  
386 diarrhea. *The ISME Journal*. 2020 2020/09/01;14(9):2223-35.
- 387 42. Ling Z, Li Z, Liu X, Cheng Y, Luo Y, Tong X, et al. Altered Fecal Microbiota Composition Associated  
388 with Food Allergy in Infants. *Applied and Environmental Microbiology*. 2014;80(8):2546-54.
- 389 43. Zhu JJ, Gao MX, Song XJ, Zhao L, Li YW, Hao ZH. Changes in bacterial diversity and composition in  
390 the faeces and colon of weaned piglets after feeding fermented soybean meal. *Journal of medical  
391 microbiology*. 2018 Aug;67(8):1181-90. PubMed PMID: 29923819. Epub 2018/06/21. eng.
- 392 44. Youssef O, Lahti L, Kokkola A, Karla T, Tikkanen M, Ehsan H, et al. Stool Microbiota Composition  
393 Differs in Patients with Stomach, Colon, and Rectal Neoplasms. *Digestive Diseases and Sciences*. 2018  
394 2018/11/01;63(11):2950-8.
- 395 45. Liang JQ, Li T, Nakatsu G, Chen Y-X, Yau TO, Chu E, et al. A novel faecal Lachnoclostridium  
396 marker for the non-invasive diagnosis of colorectal adenoma and cancer. *Gut*. 2020;69(7):1248.
- 397 46. Klein-Jöbstl D, Schornsteiner E, Mann E, Wagner M, Drillich M, Schmitz-Esser S. Pyrosequencing  
398 reveals diverse fecal microbiota in Simmental calves during early development. *Front Microbiol*. 2014  
399 2014-November-17;5(622). English.
- 400 47. Malmuthuge N, Griebel PJ, Guan le L. Taxonomic identification of commensal bacteria  
401 associated with the mucosa and digesta throughout the gastrointestinal tracts of preweaned calves.  
402 *Appl Environ Microbiol*. 2014 Mar;80(6):2021-8. PubMed PMID: 24441166. Pubmed Central PMCID:  
403 3957634.
- 404 48. Tomassini L. Rectal microbiota dynamics in pre-weaned dairy calves depending on colostrum  
405 intake, presence of diarrhea and antibiotic treatment: Washington State University; 2015.



- 406 49. Hennessy ML, Indugu N, Vecchiarelli B, Bender J, Pappalardo C, Leibstein M, et al. Temporal  
407 changes in the fecal bacterial community in Holstein dairy calves from birth through the transition to a  
408 solid diet. *PLoS one*. 2020;15(9):e0238882.
- 409 50. Han SH, Yi J, Kim JH, Lee S, Moon HW. Composition of gut microbiota in patients with toxigenic  
410 *Clostridioides (Clostridium) difficile*: Comparison between subgroups according to clinical criteria and  
411 toxin gene load. *PLoS one*. 2019;14(2):e0212626. PubMed PMID: 30785932.
- 412 51. Pérez-Cobas AE, Artacho A, Ott SJ, Moya A, Gosalbes MJ, Latorre A. Structural and functional  
413 changes in the gut microbiota associated to *Clostridium difficile* infection. *Front Microbiol*. 2014;5:335-  
414 PubMed PMID: 25309515. eng.
- 415 52. Eeckhaut V, Machiels K, Perrier C, Romero C, Maes S, Flahou B, et al. *Butyricoccus*  
416 *pullicaecorum* in inflammatory bowel disease. *Gut*. 2013;62(12):1745-52.
- 417 53. Devriese S, Eeckhaut V, Geirnaert A, Van den Bossche L, Hindryckx P, Van de Wiele T, et al.  
418 Reduced Mucosa-associated *Butyricoccus* Activity in Patients with Ulcerative Colitis Correlates with  
419 Aberrant Claudin-1 Expression. *Journal of Crohn's and Colitis*. 2016;11(2):229-36.
- 420 54. Hang BPT, Wredle E, Dicksved J. Analysis of the developing gut microbiota in young dairy  
421 calves—impact of colostrum microbiota and gut disturbances. *Tropical Animal Health and Production*.  
422 2020 2020/12/28;53(1):50.
- 423 55. Furusawa Y, Obata Y, Fukuda S, Endo TA, Nakato G, Takahashi D, et al. Commensal microbe-  
424 derived butyrate induces the differentiation of colonic regulatory T cells. *Nature*. 2013  
425 2013/12/01;504(7480):446-50.
- 426 56. Alipour MJ, Jalanka J, Pessa-Morikawa T, Kokkonen T, Satokari R, Hynönen U, et al. The  
427 composition of the perinatal intestinal microbiota in cattle. *Sci Rep*. 2018;8(1):10437-. PubMed PMID:  
428 29993024. eng.

429

430

431

432 **Figure legends**

433

434 Figure 1: Distribution of age and *C. difficile* colonization status in 92 pre-weaned Holstein dairy calves

435

436 Figure 2: Alpha diversity of the gut microbiome in 86 pre-weaned Holstein dairy calves by *C. difficile*  
437 colonization status

438

439 Figure 3: Beta diversity of the gut microbiome in 86 pre-weaned Holstein dairy calves by *C. difficile*  
440 colonization status. A. Bray-Curtis beta diversity. B. Weighted UniFrac.

441

442 Figure 4: Bray-Curtis principal coordinate analysis (PCoA) of fecal samples from 86 pre-weaned dairy  
443 calves by *C. difficile* colonization status and by farm

444

445 Figure 5: Distribution of bacterial phyla by *C. difficile* status in fecal samples from 86 pre-weaned dairy  
446 calves. The nine most abundant phyla are displayed.

447

448 Figure 6: Distribution of bacterial taxa that were found at higher levels in *C. difficile*-positive calves by *C.*  
449 *difficile* colonization status in 86 pre-weaned Holstein dairy calves. A. *Butyricoccus*. B. *Clostridium sensu*  
450 *stricto* 2. C. *Ruminococcus gnavus*. D. *Lachnoclostridium*.

451

452 Figure 7. Analysis of co-occurrence among microbial lineages scored using the Dice index by *C. difficile*-  
453 colonization status (positive and negative). Dice indexes are shown as a heat map for all genera present at  
454 a level of abundance greater than 1% and with statistically significant ( $p < 0.01$ ) co-occurrence are shown  
455 as a heatmap. The degree of co-occurrence is shown by the color code at the bottom.

456

bioRxiv preprint doi: <https://doi.org/10.1101/2021.05.11.443551>; this version posted May 11, 2021. The copyright holder for this preprint (which was not certified by peer review) is the author/funder, who has granted bioRxiv a license to display the preprint in perpetuity. It is made available under aCC-BY 4.0 International license.

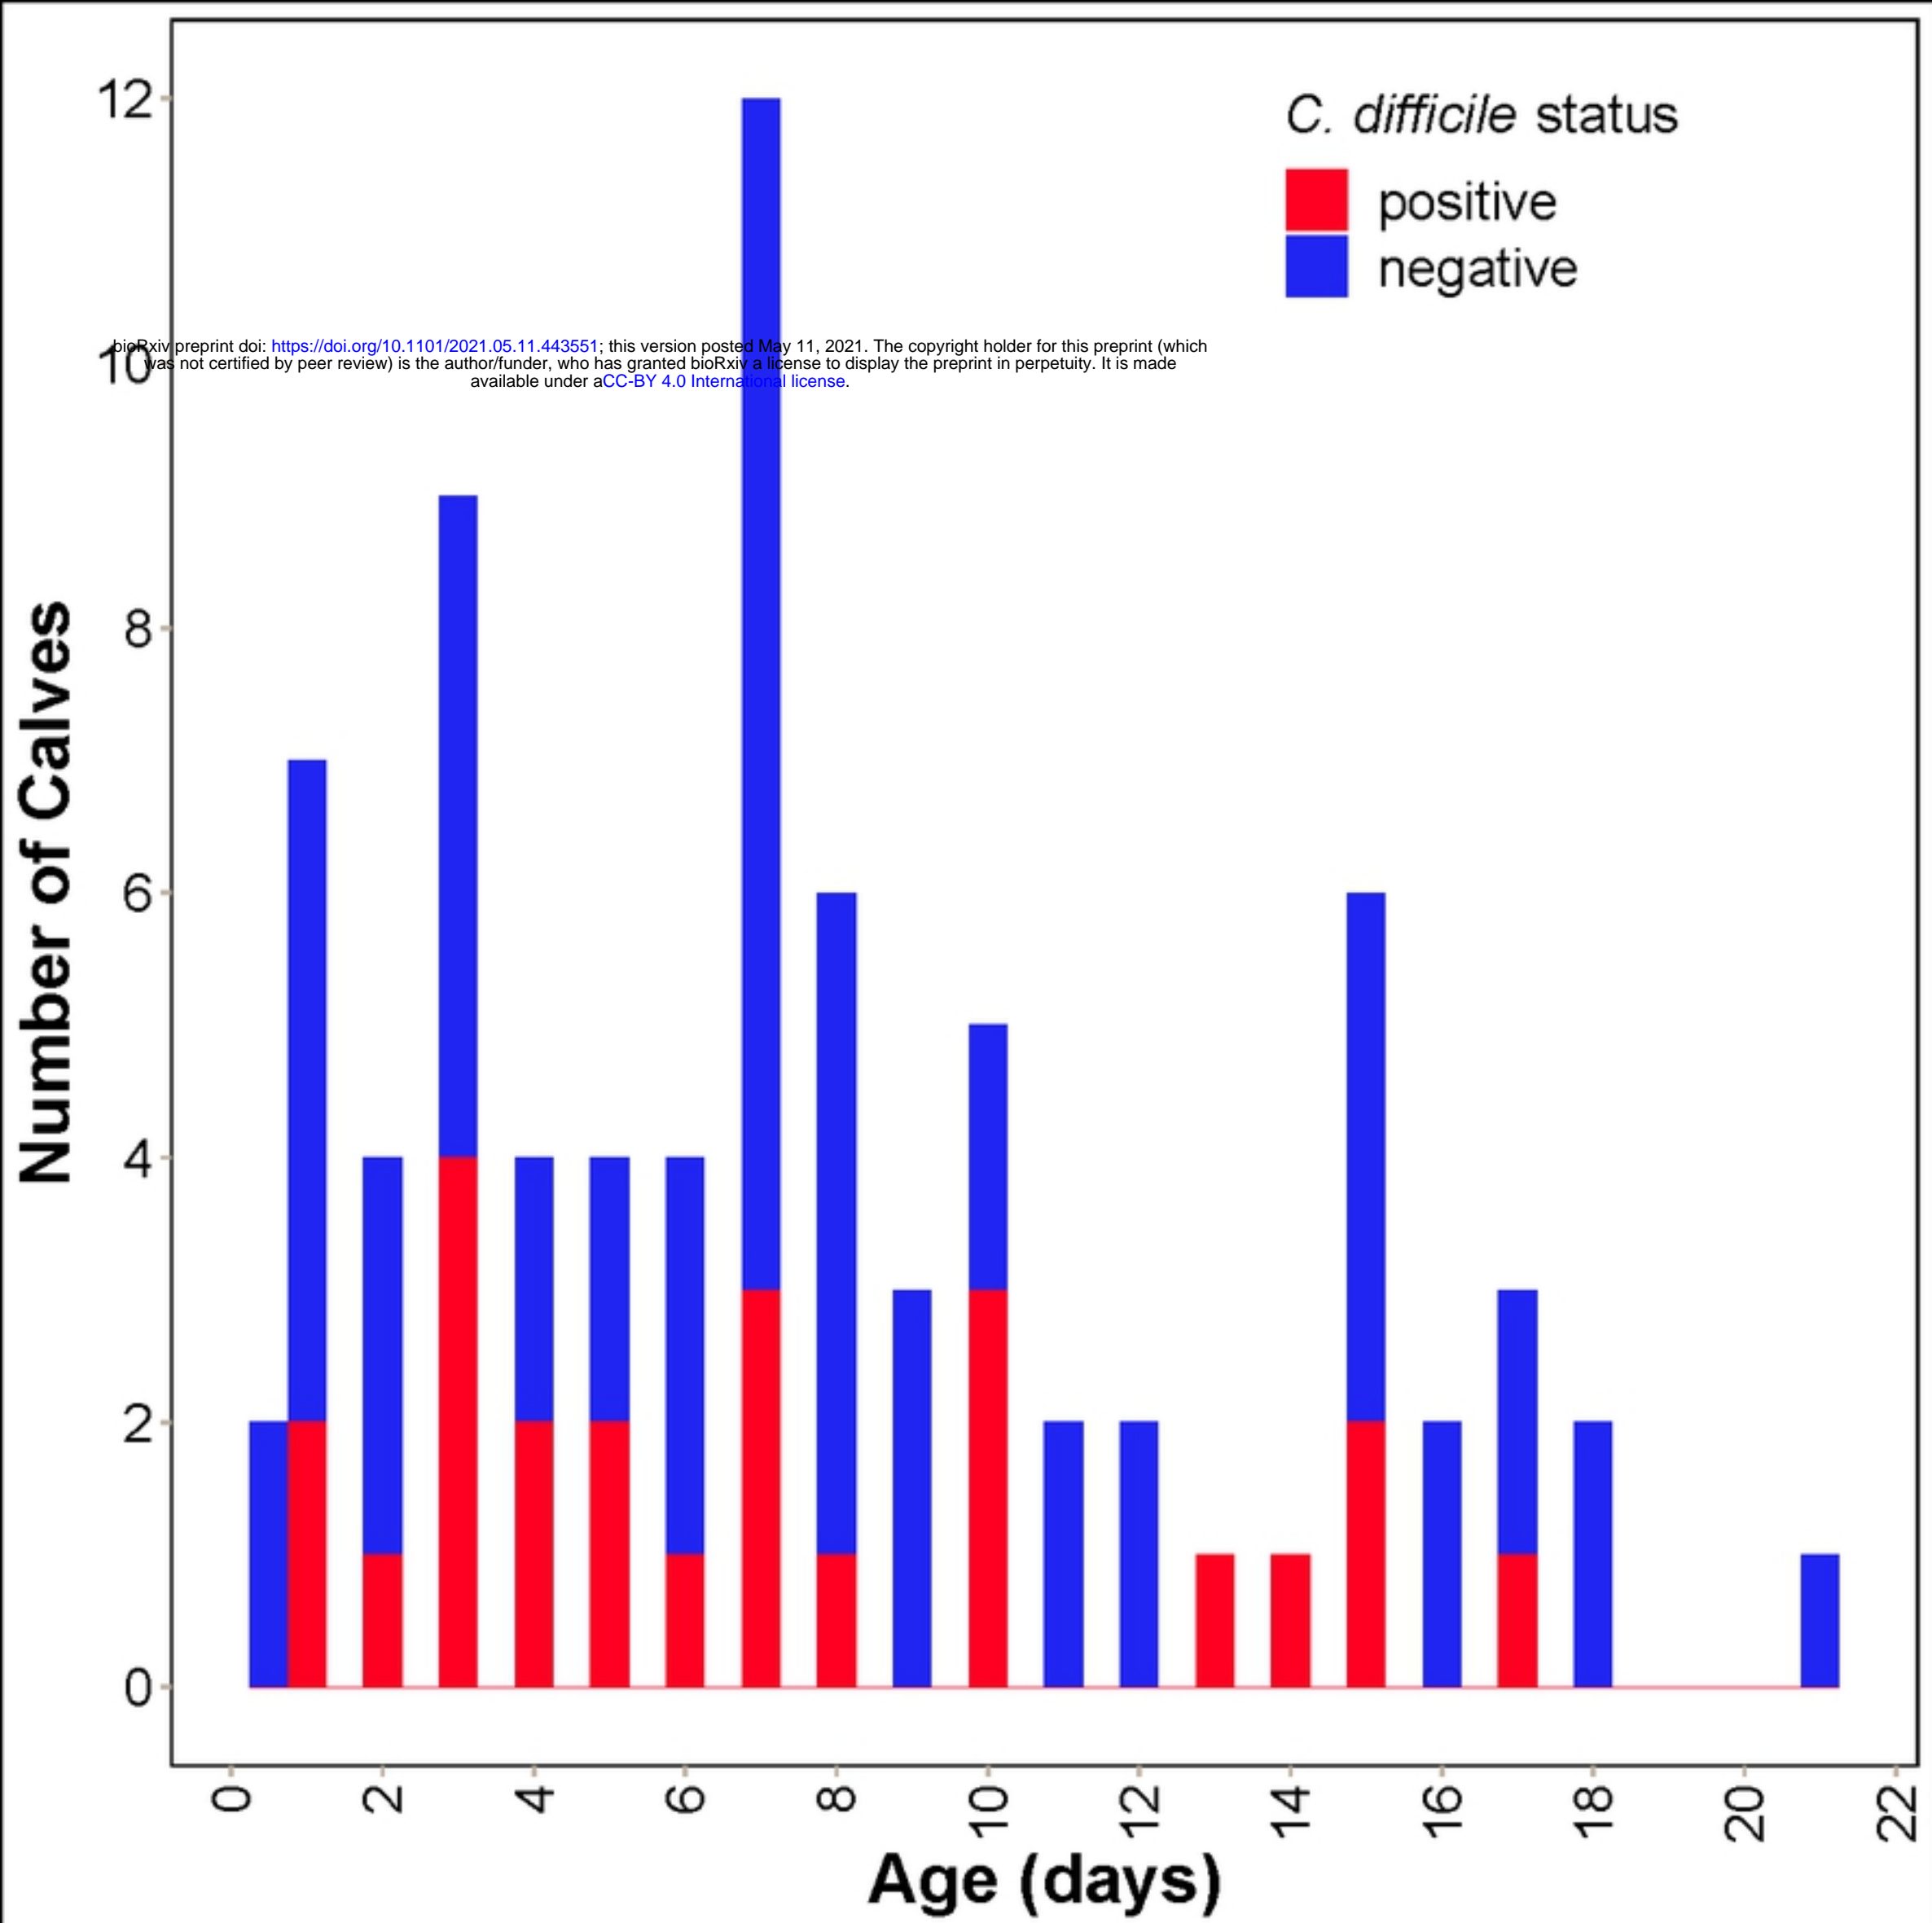

Figure

bioRxiv preprint doi: <https://doi.org/10.1101/2021.05.11.443551>; this version posted May 11, 2021. The copyright holder for this preprint (which was not certified by peer review) is the author/funder, who has granted bioRxiv a license to display the preprint in perpetuity. It is made available under aCC-BY 4.0 International license.

Shannon Alpha Diversity

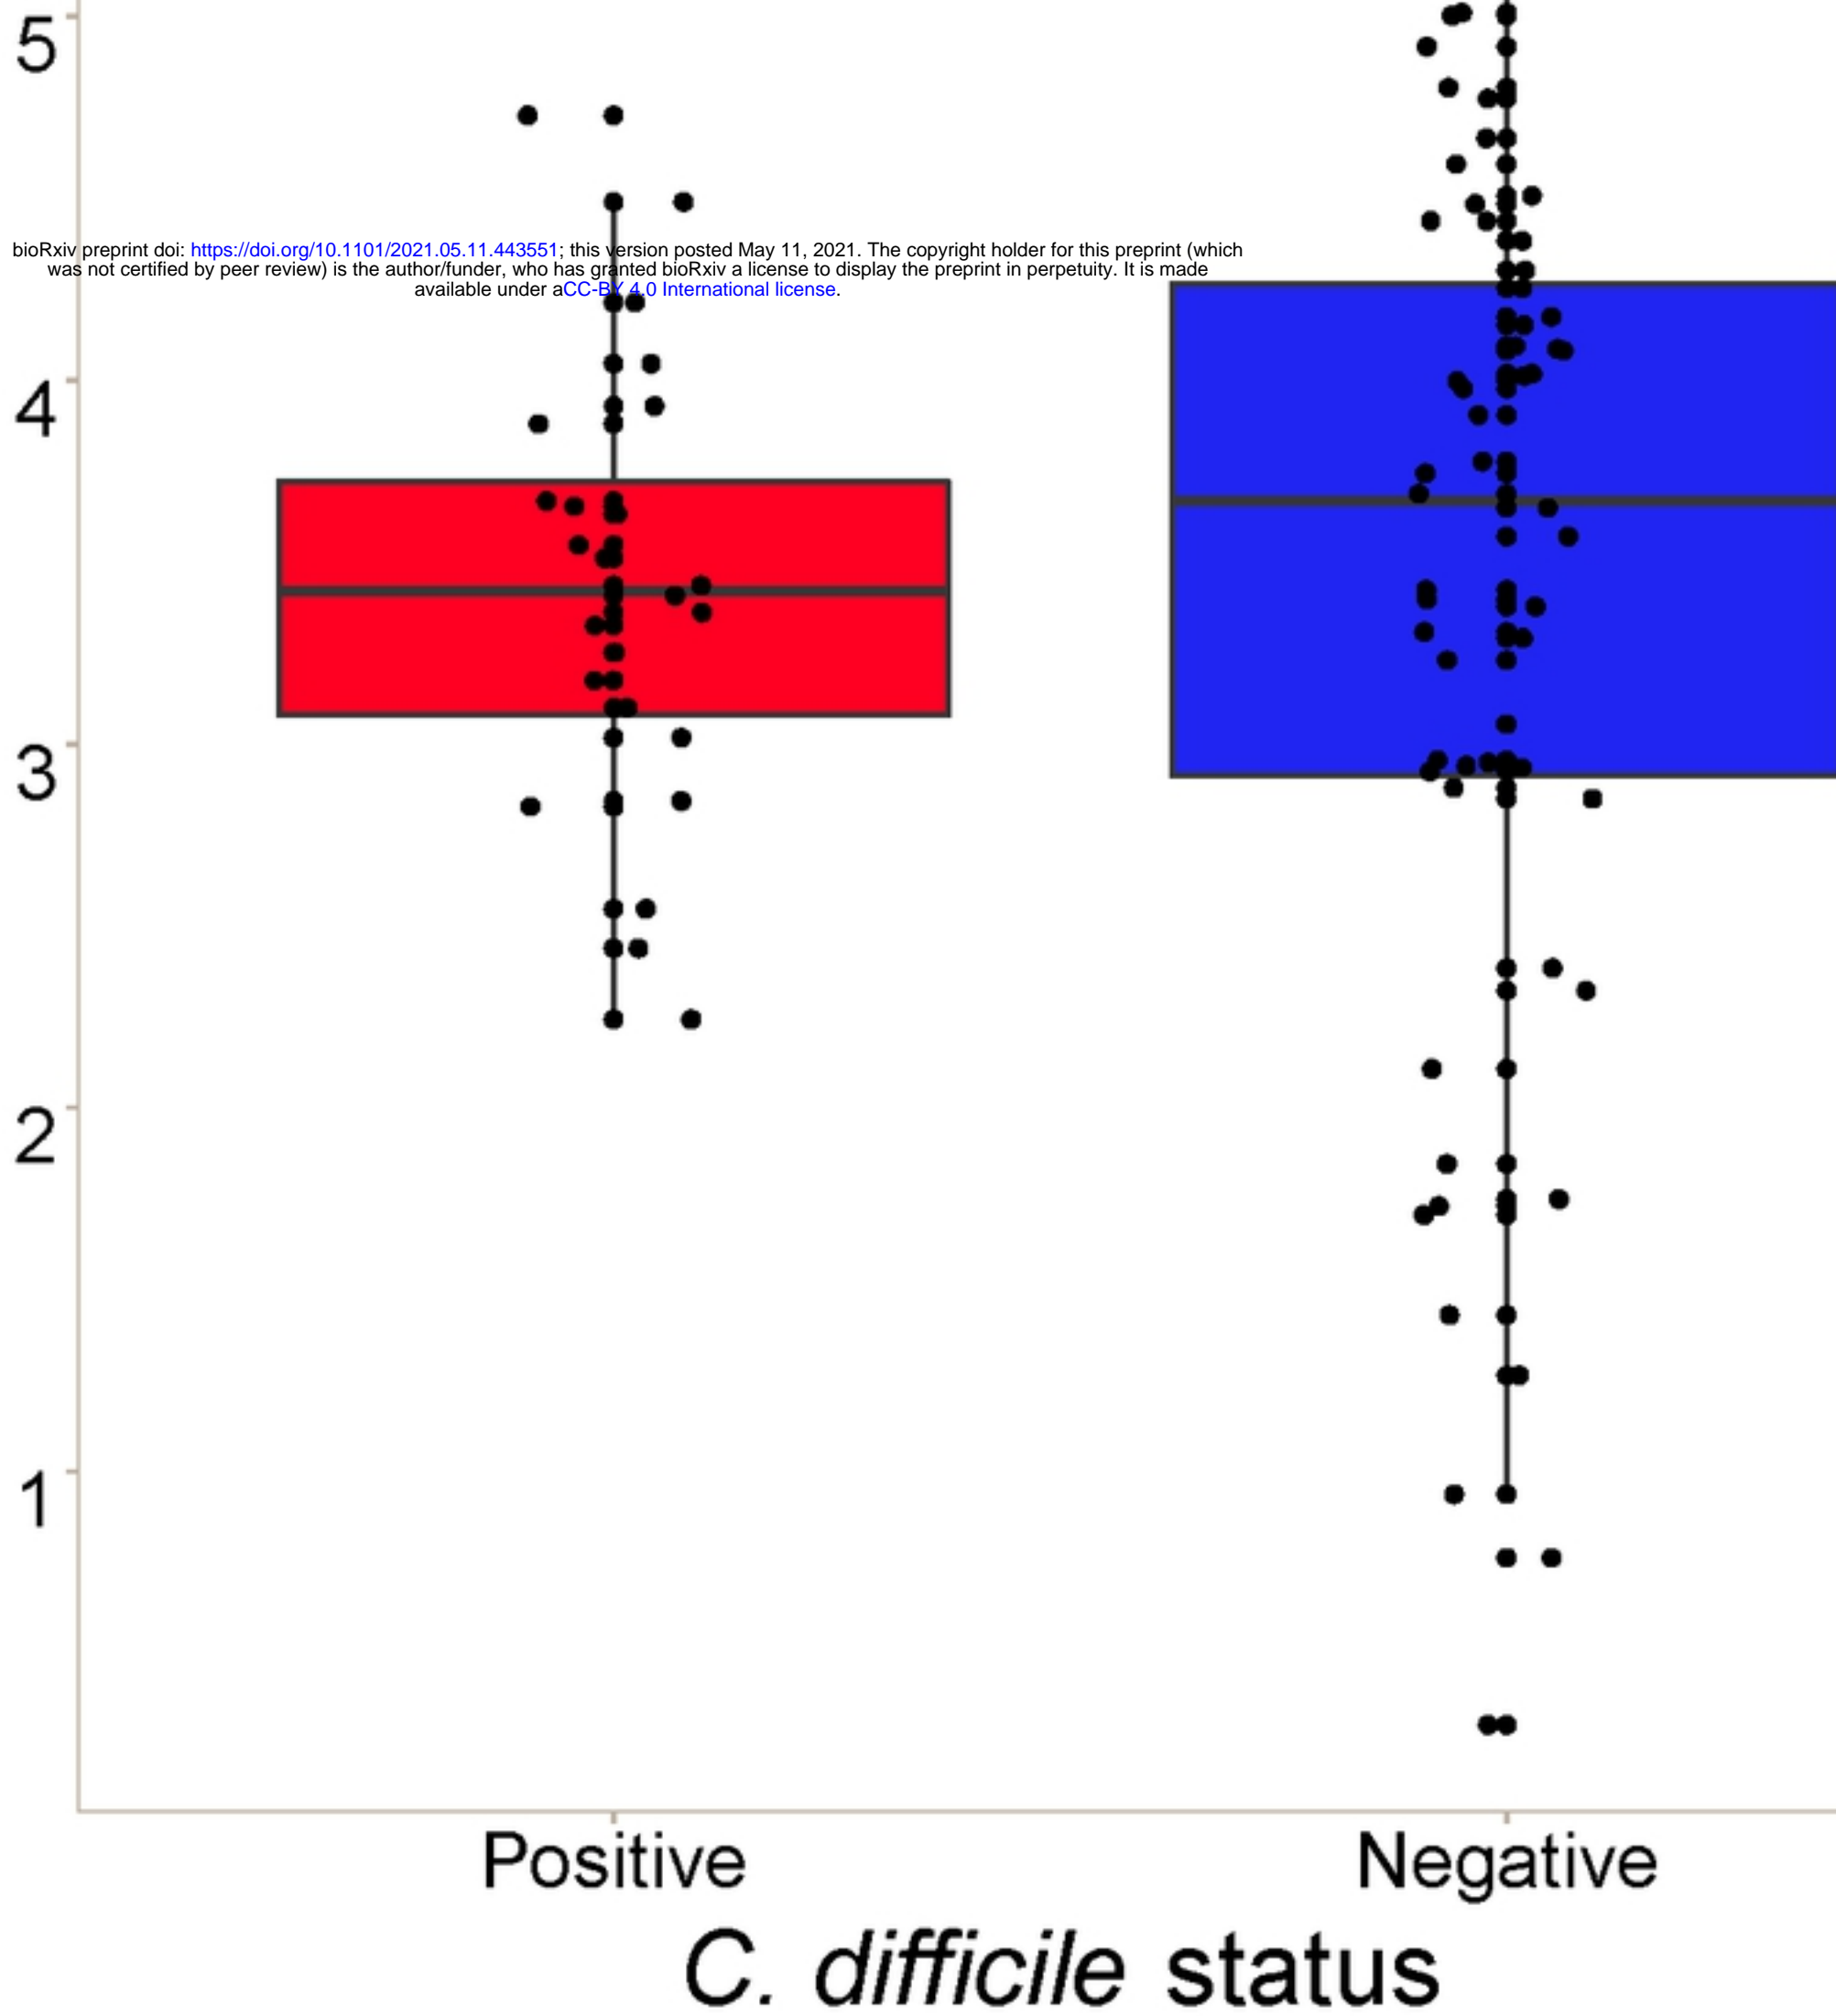

Figure

# Bray-Curtis

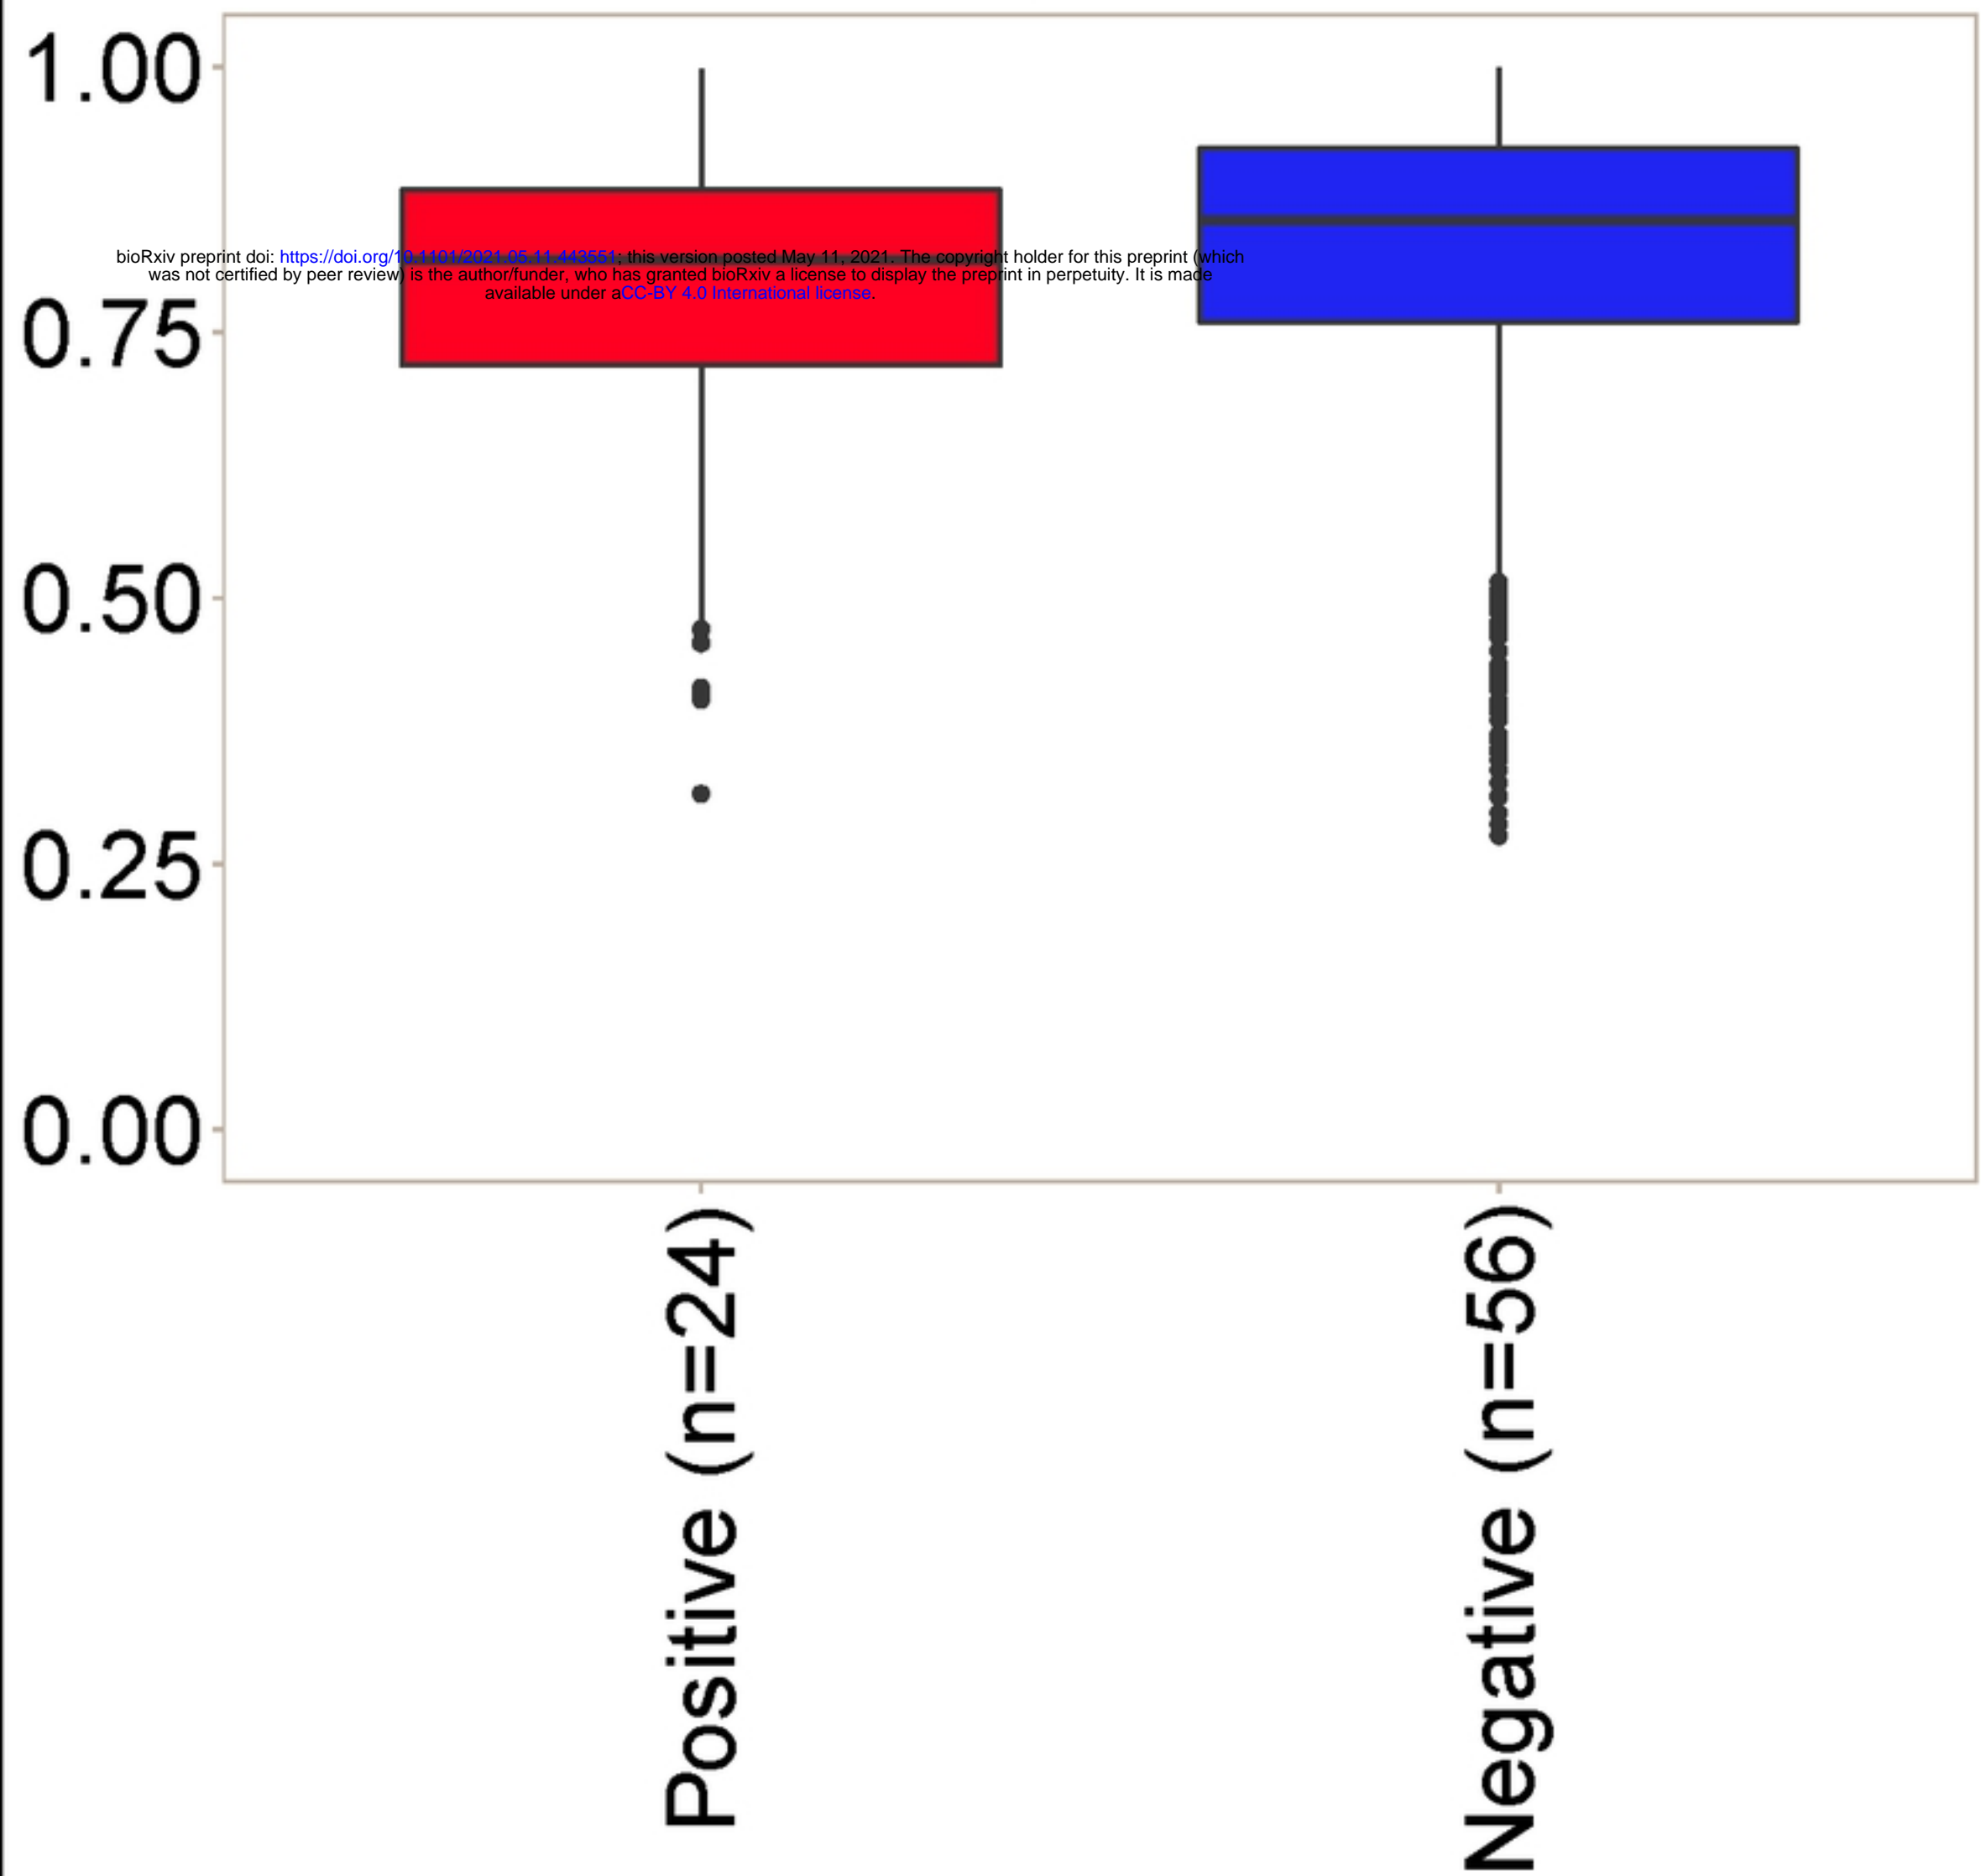

Figure

# Weighted UniFrac

bioRxiv preprint doi: <https://doi.org/10.1101/2021.05.11.443551>; this version posted May 11, 2021. The copyright holder for this preprint (which was not certified by peer review) is the author/funder, who has granted bioRxiv a license to display the preprint in perpetuity. It is made available under aCC-BY 4.0 International license.

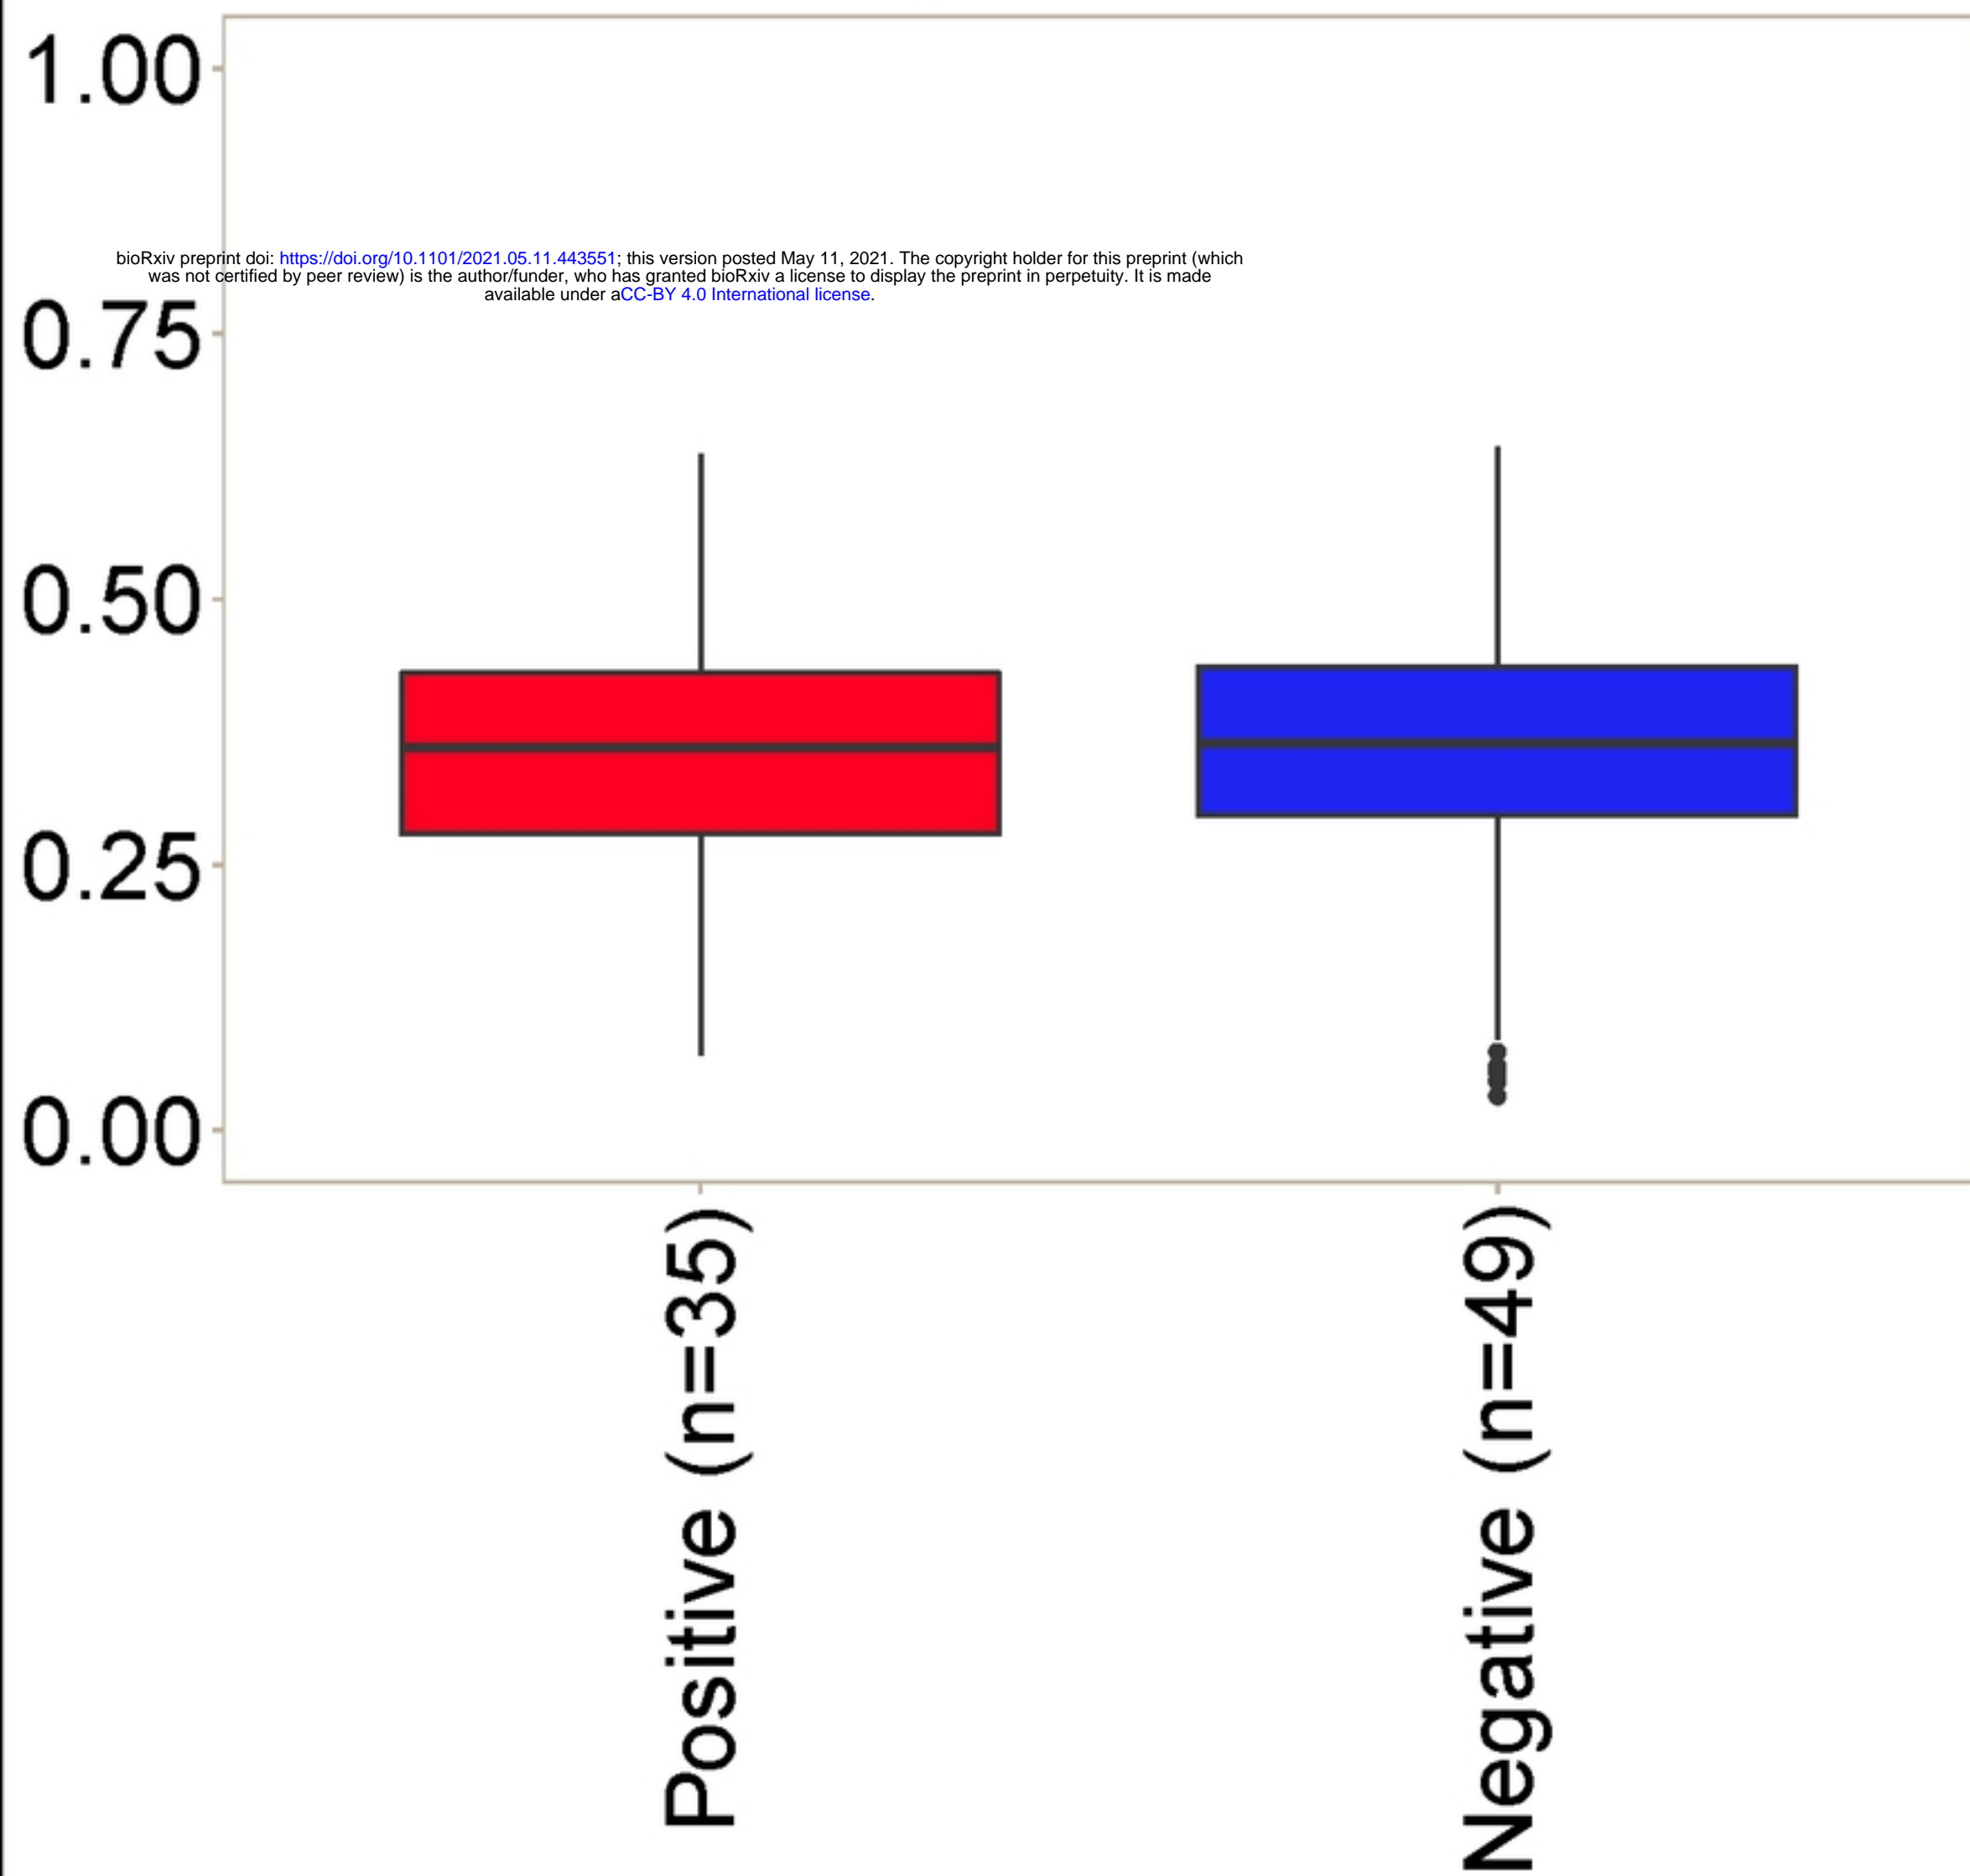

Figure

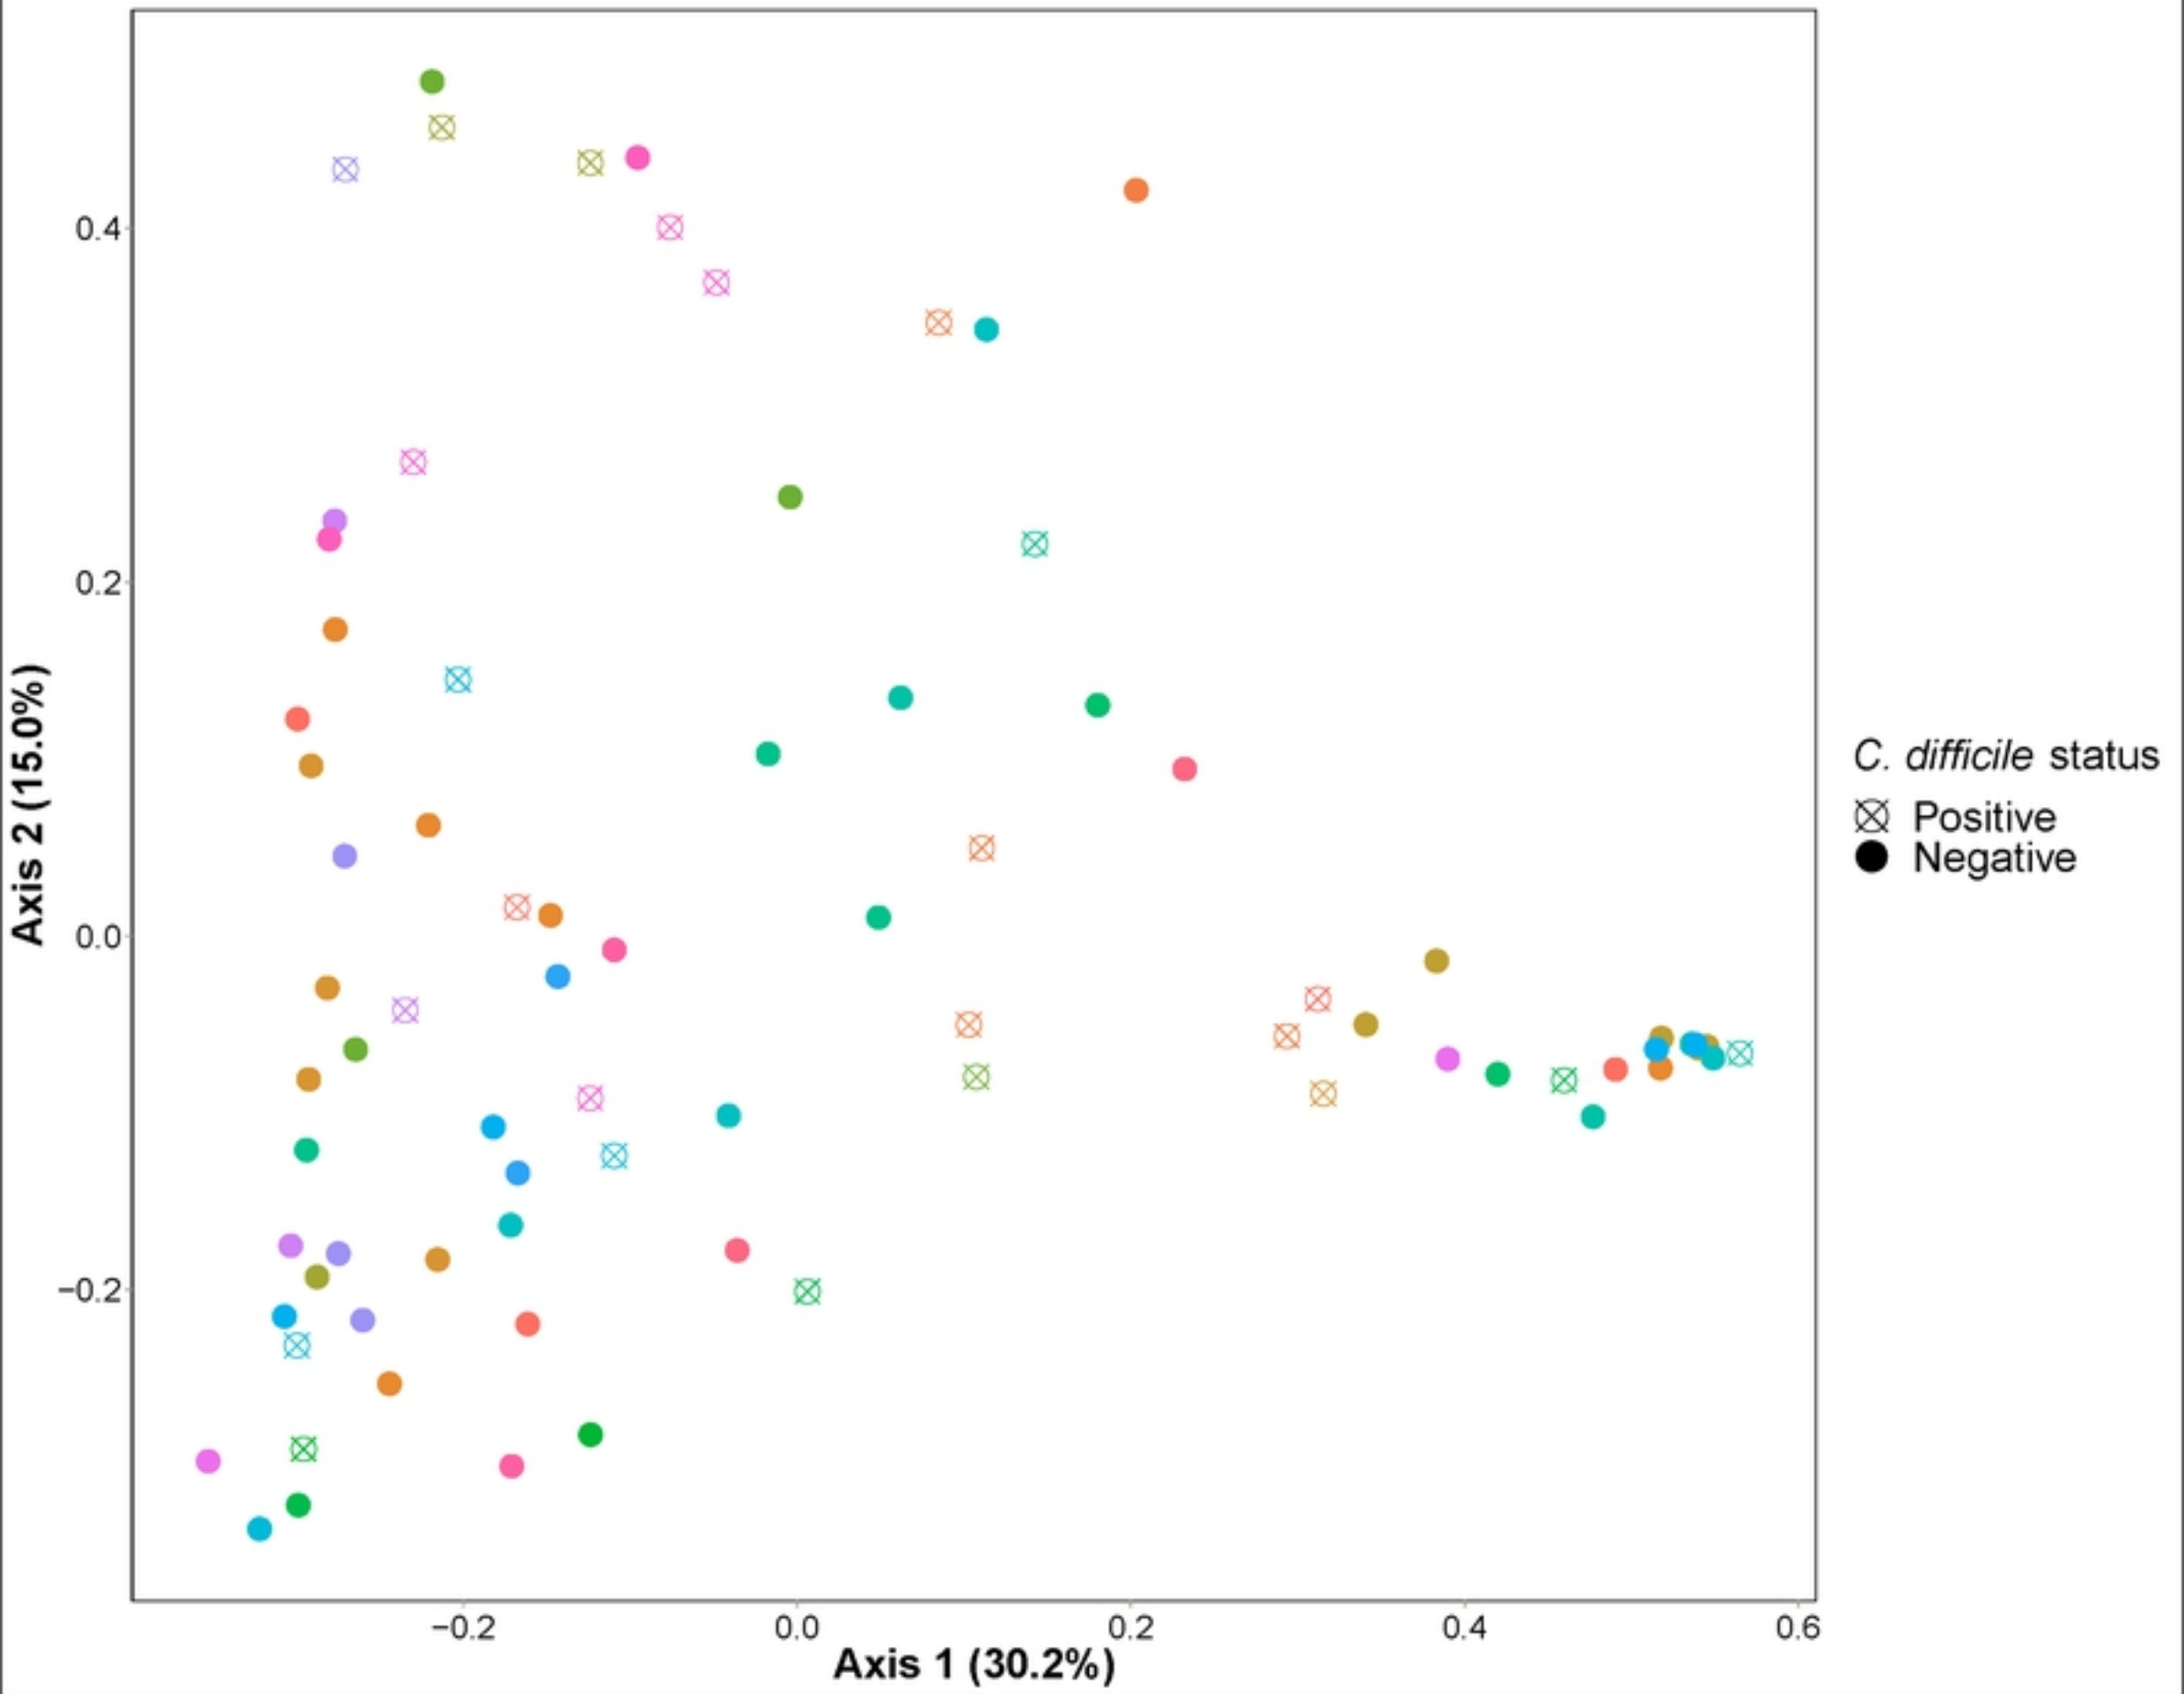

Figure

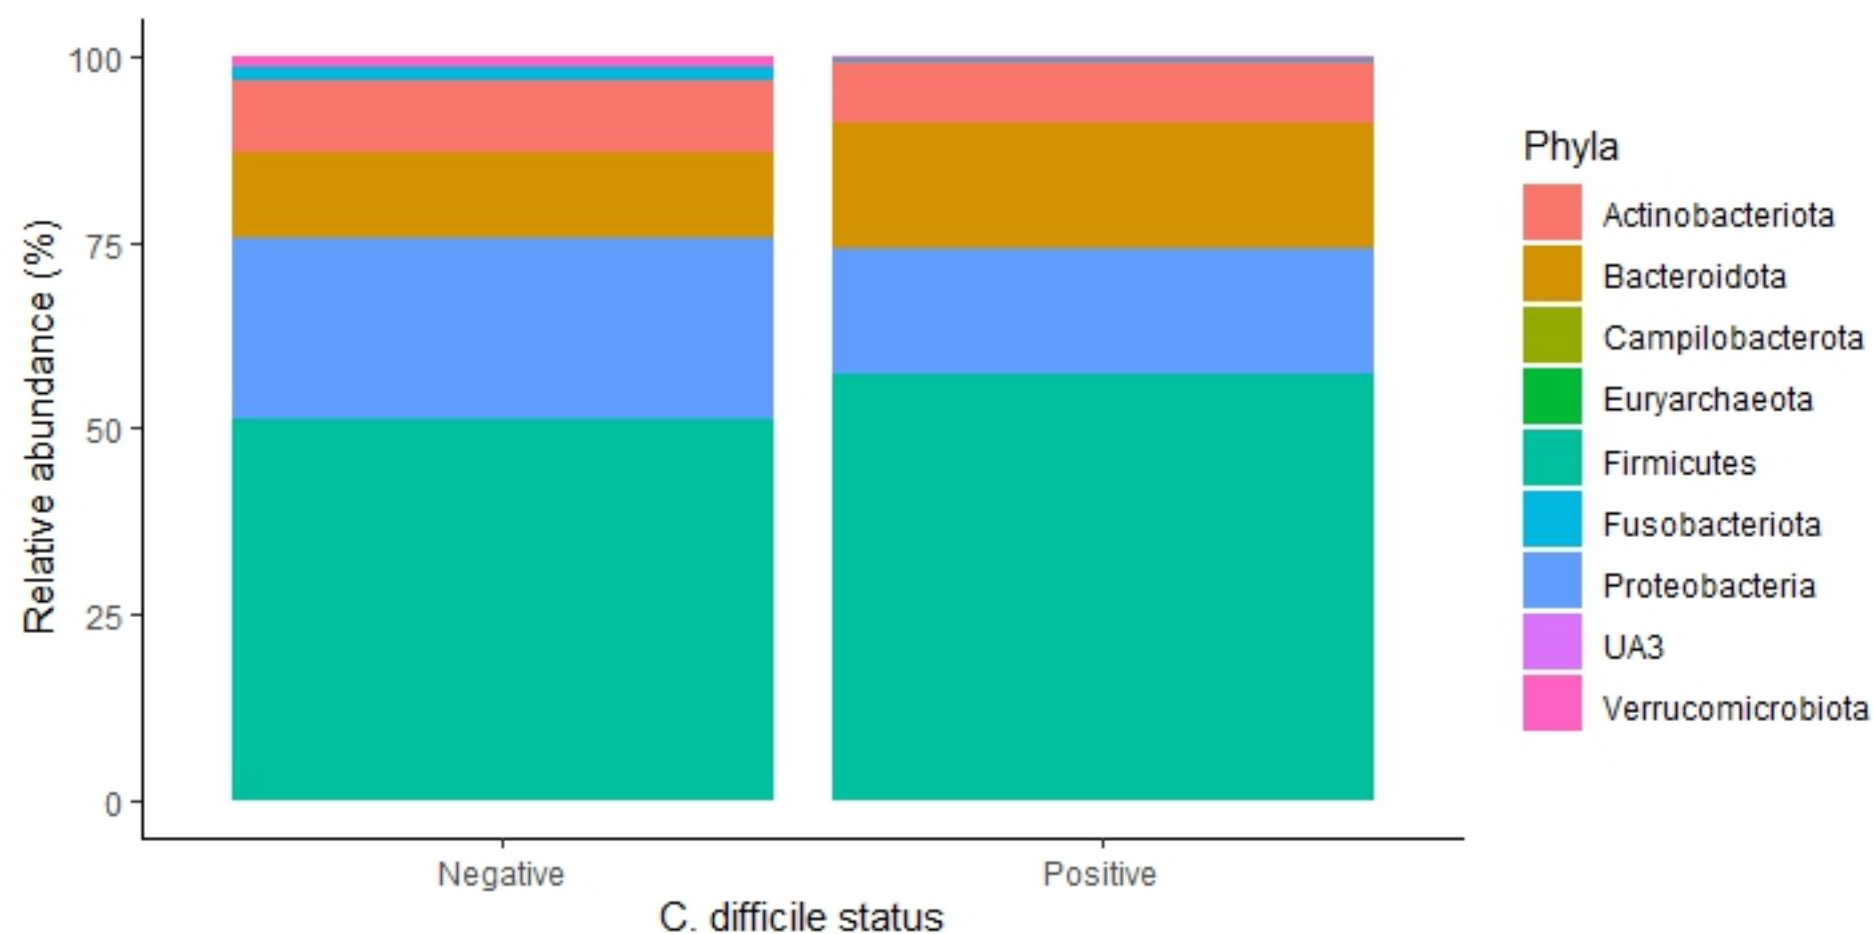

Figure



# Butyricicoccus

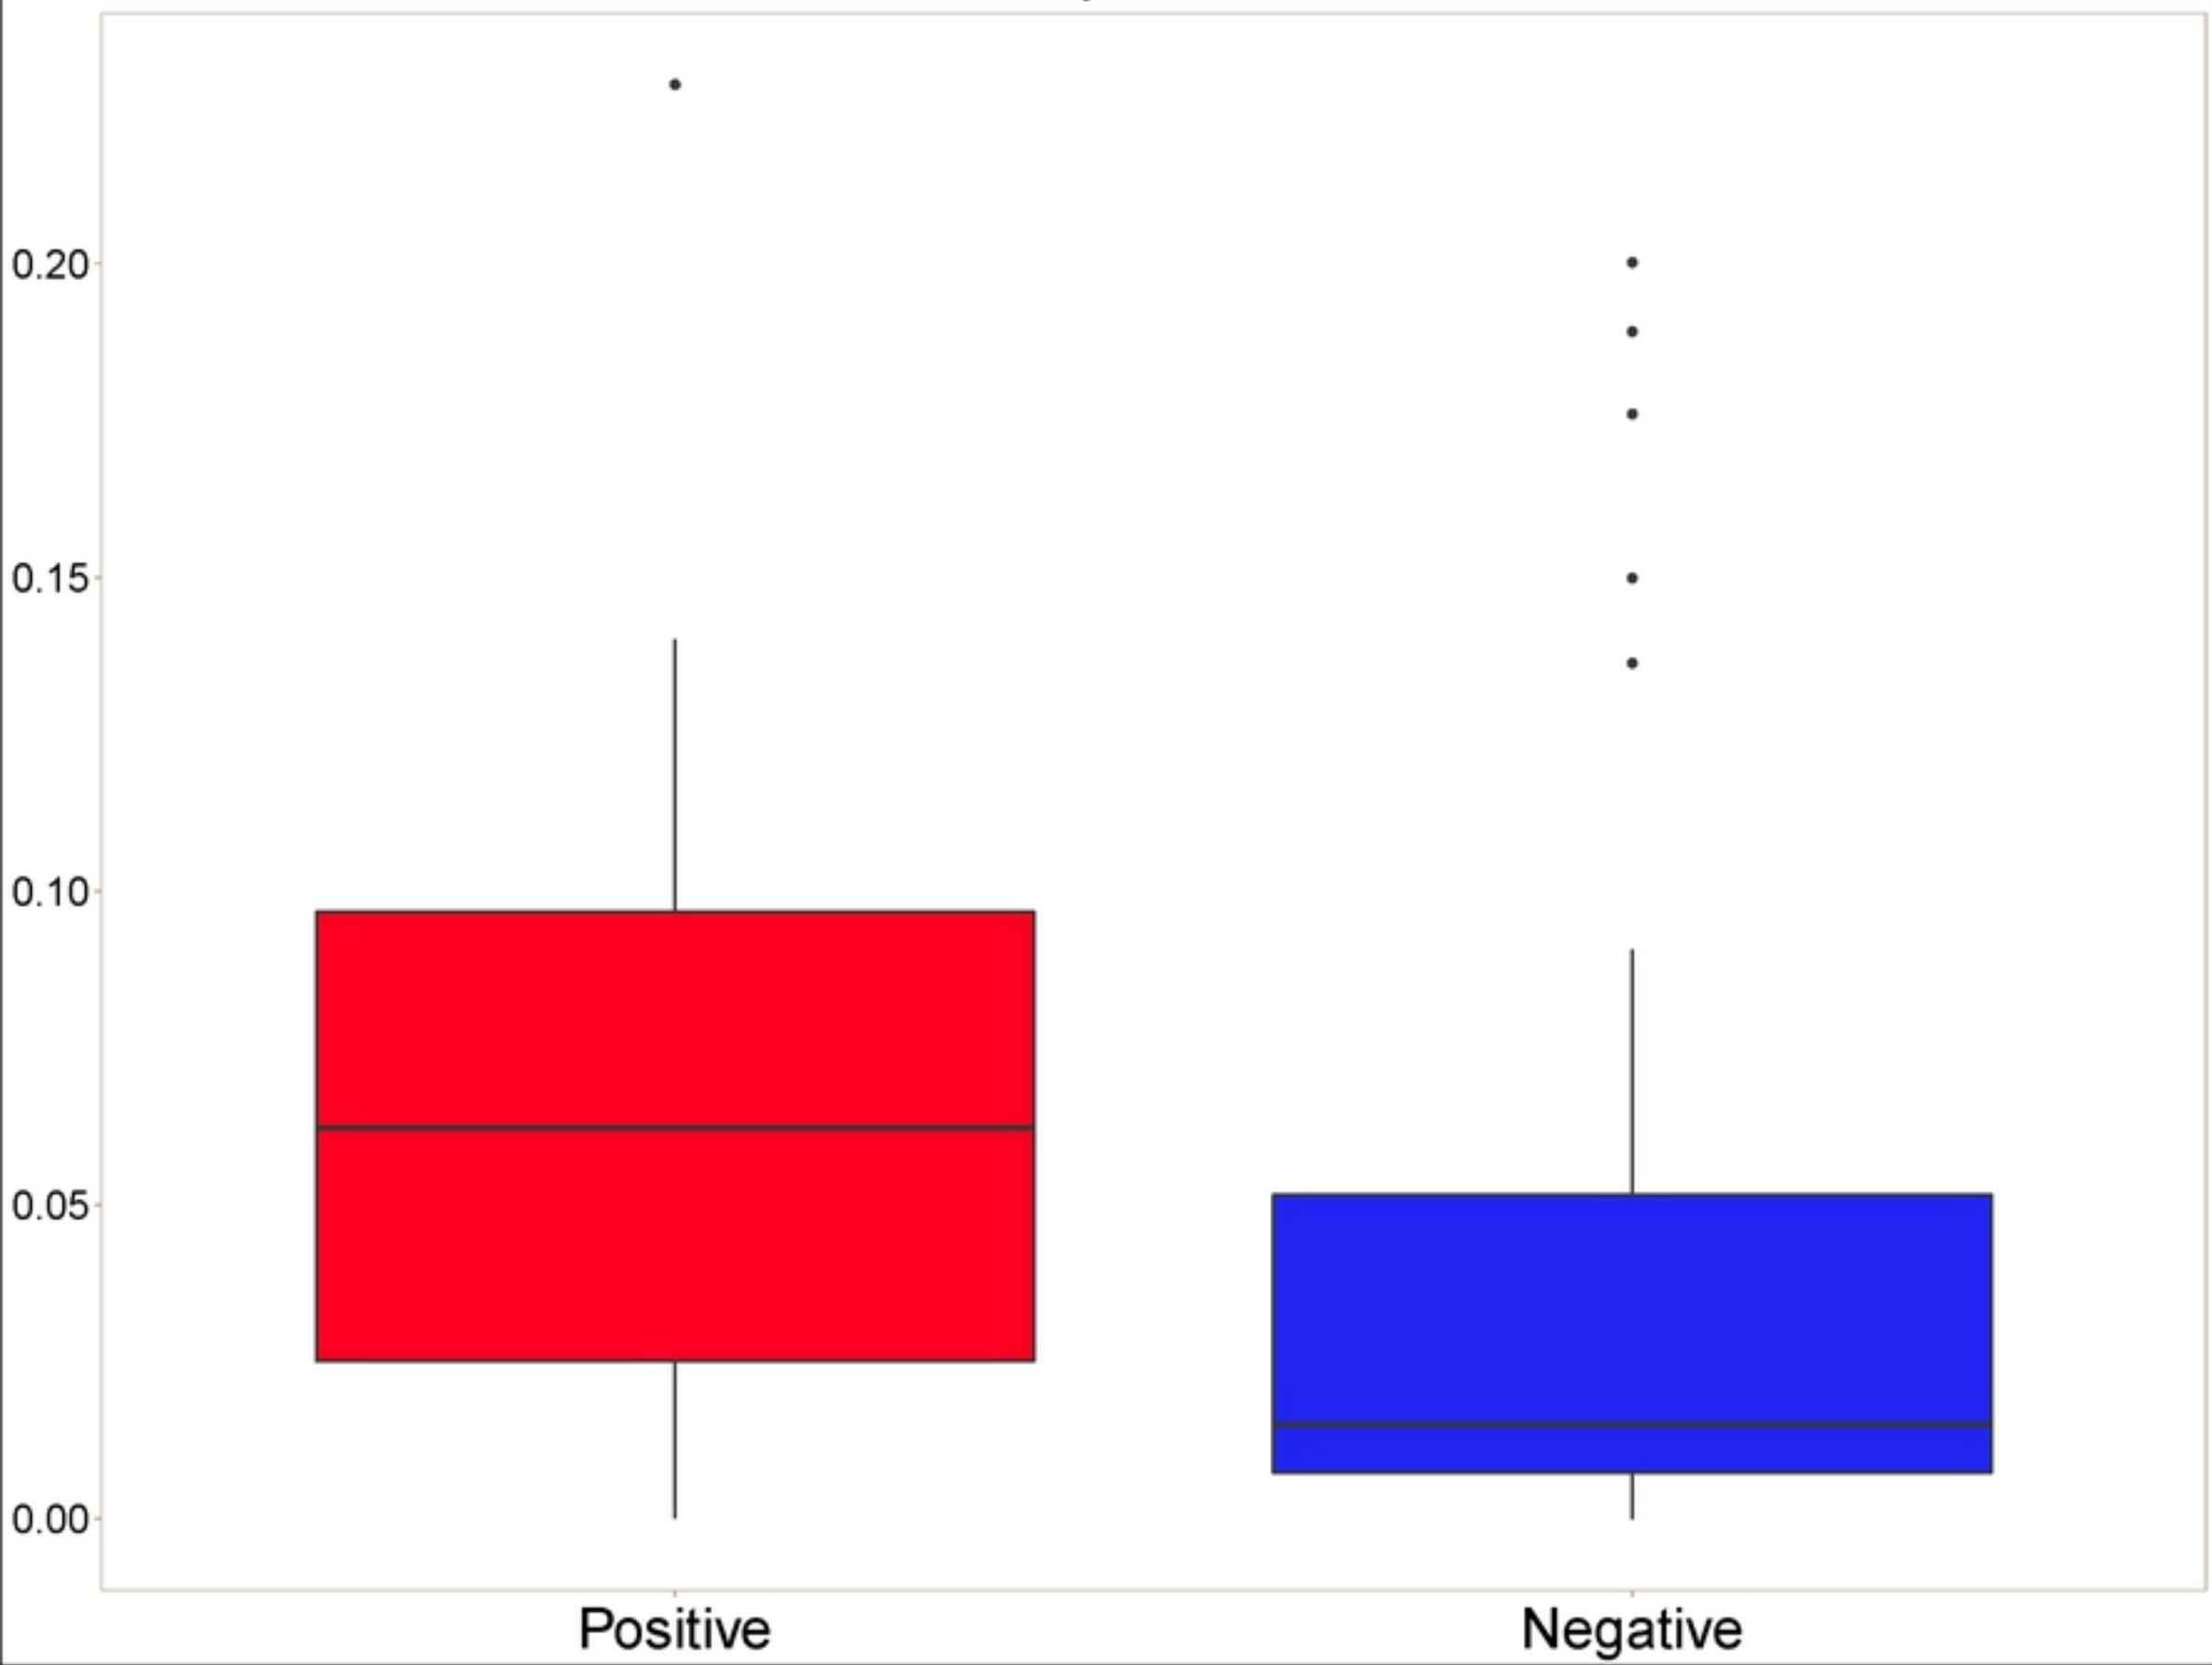

Figure

Clostridium (sensu stricto 2)

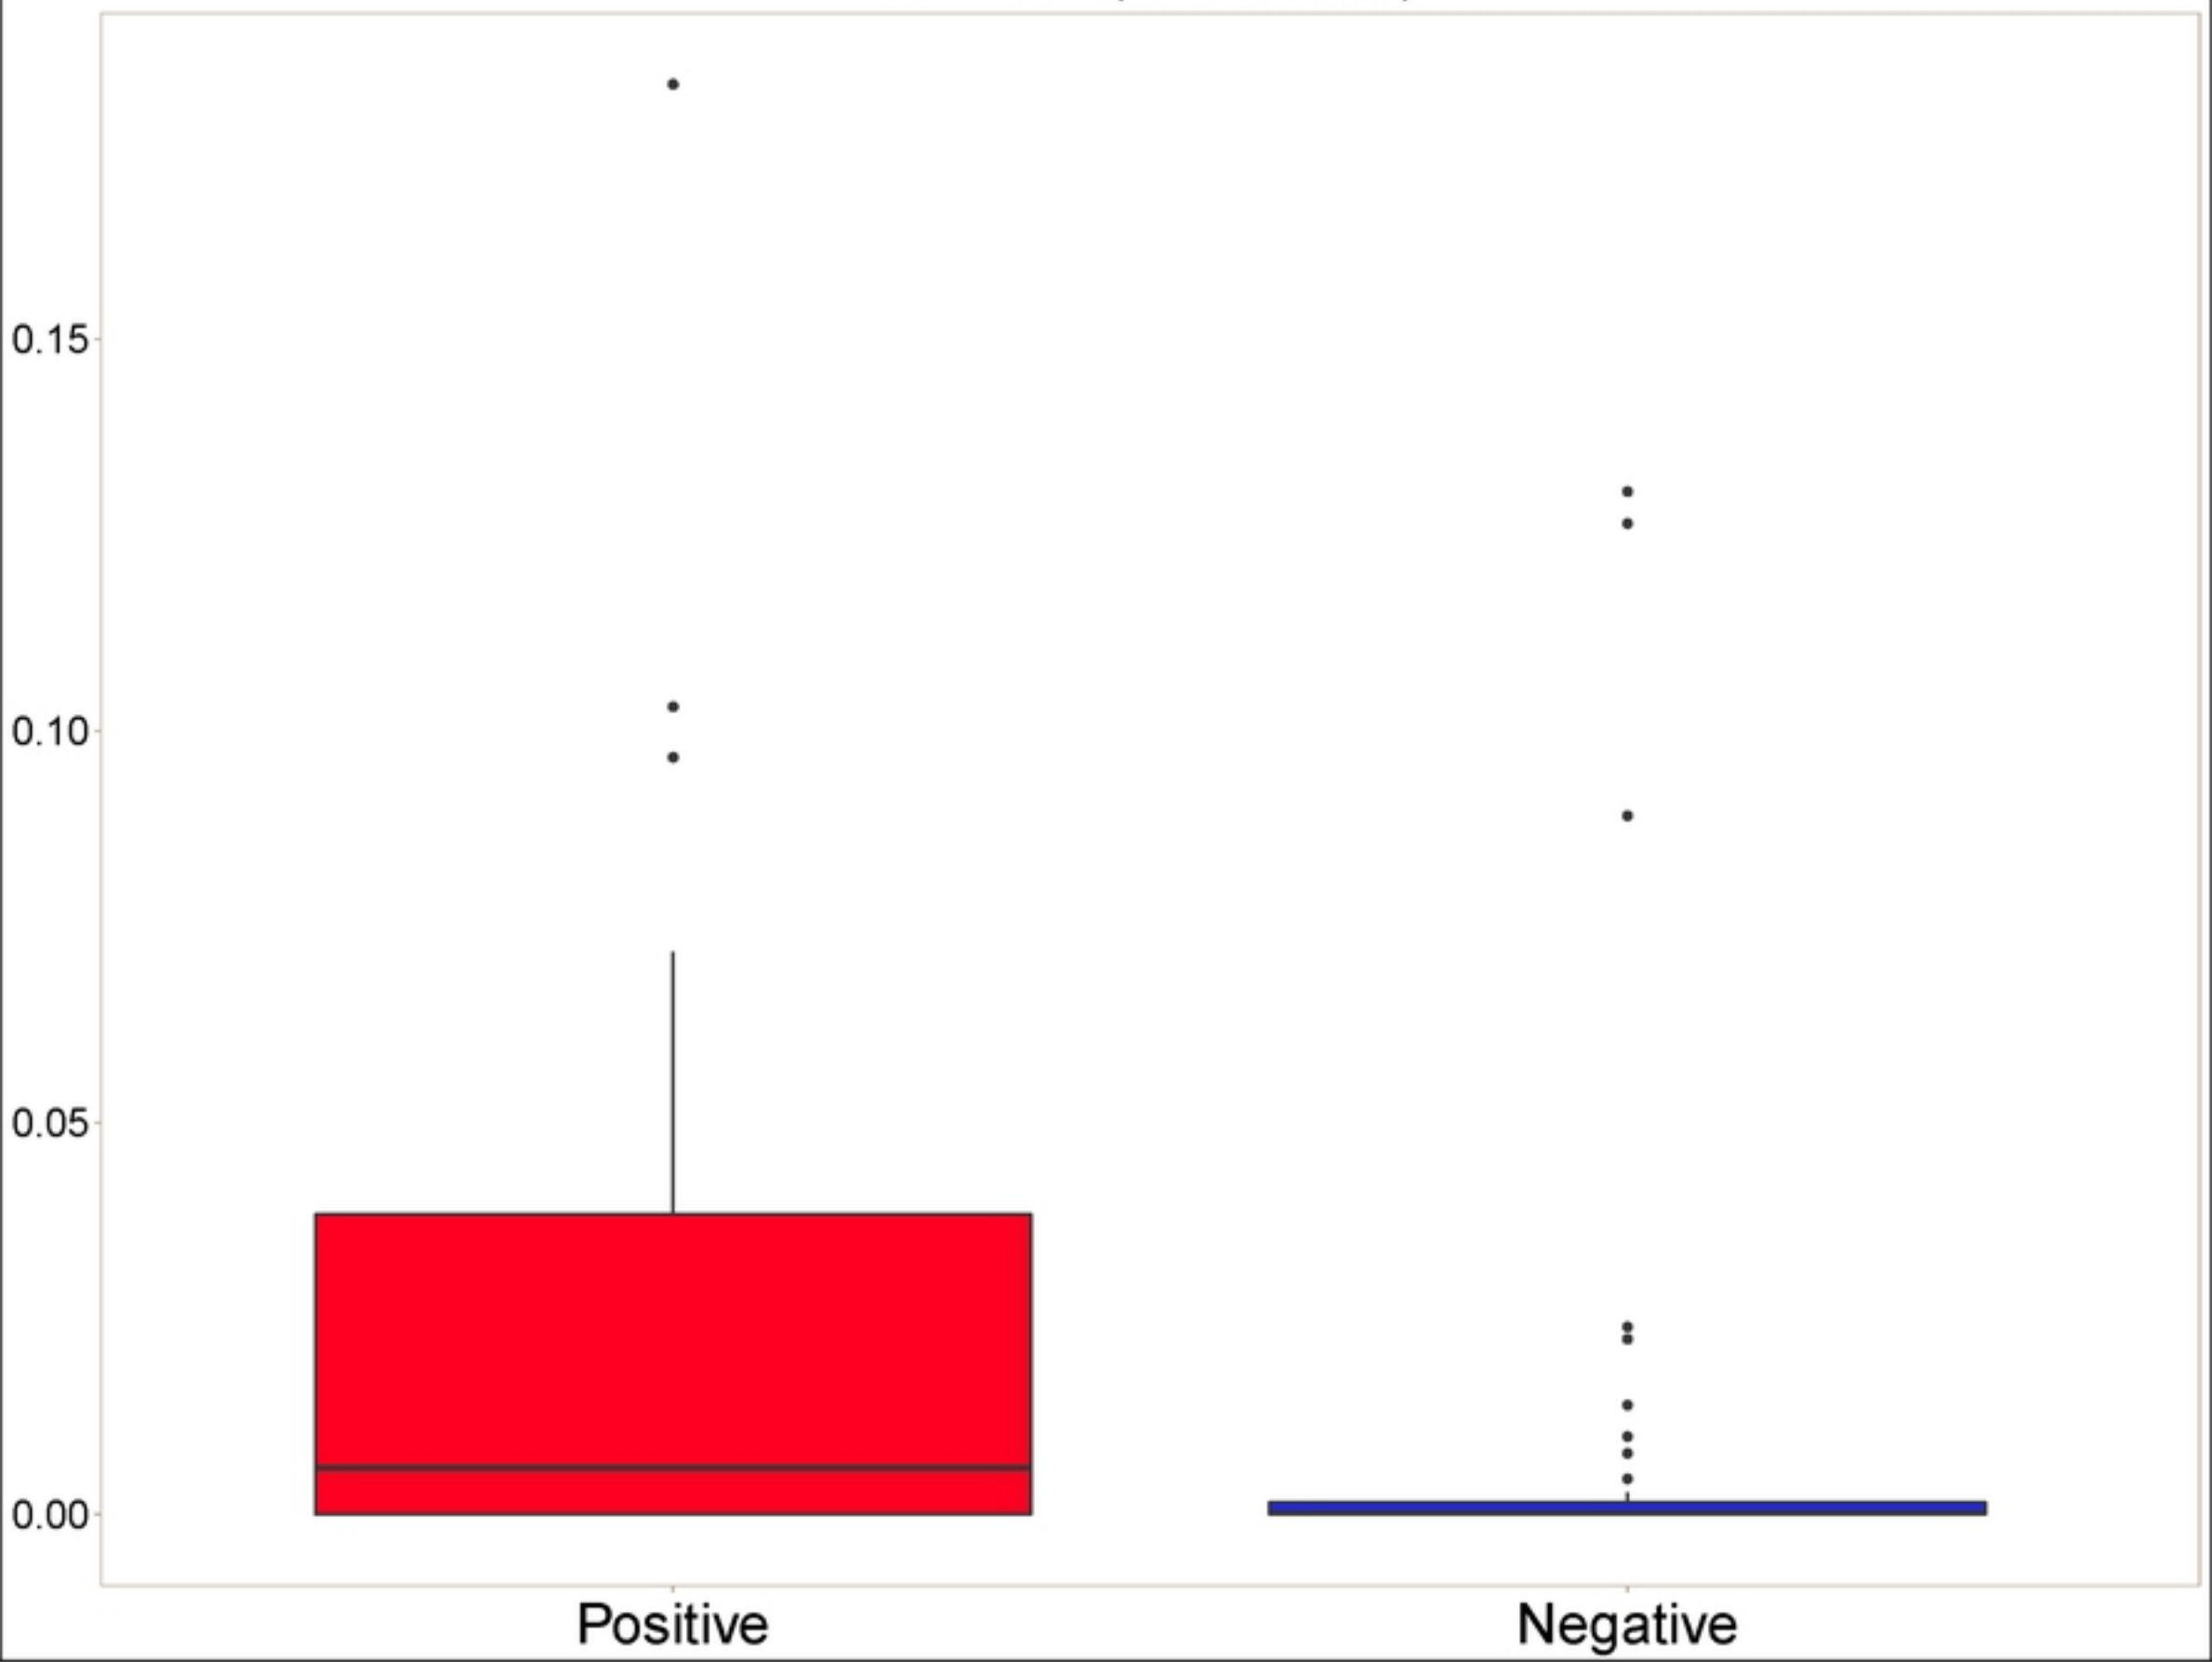

Figure

# Lachnoclostridium

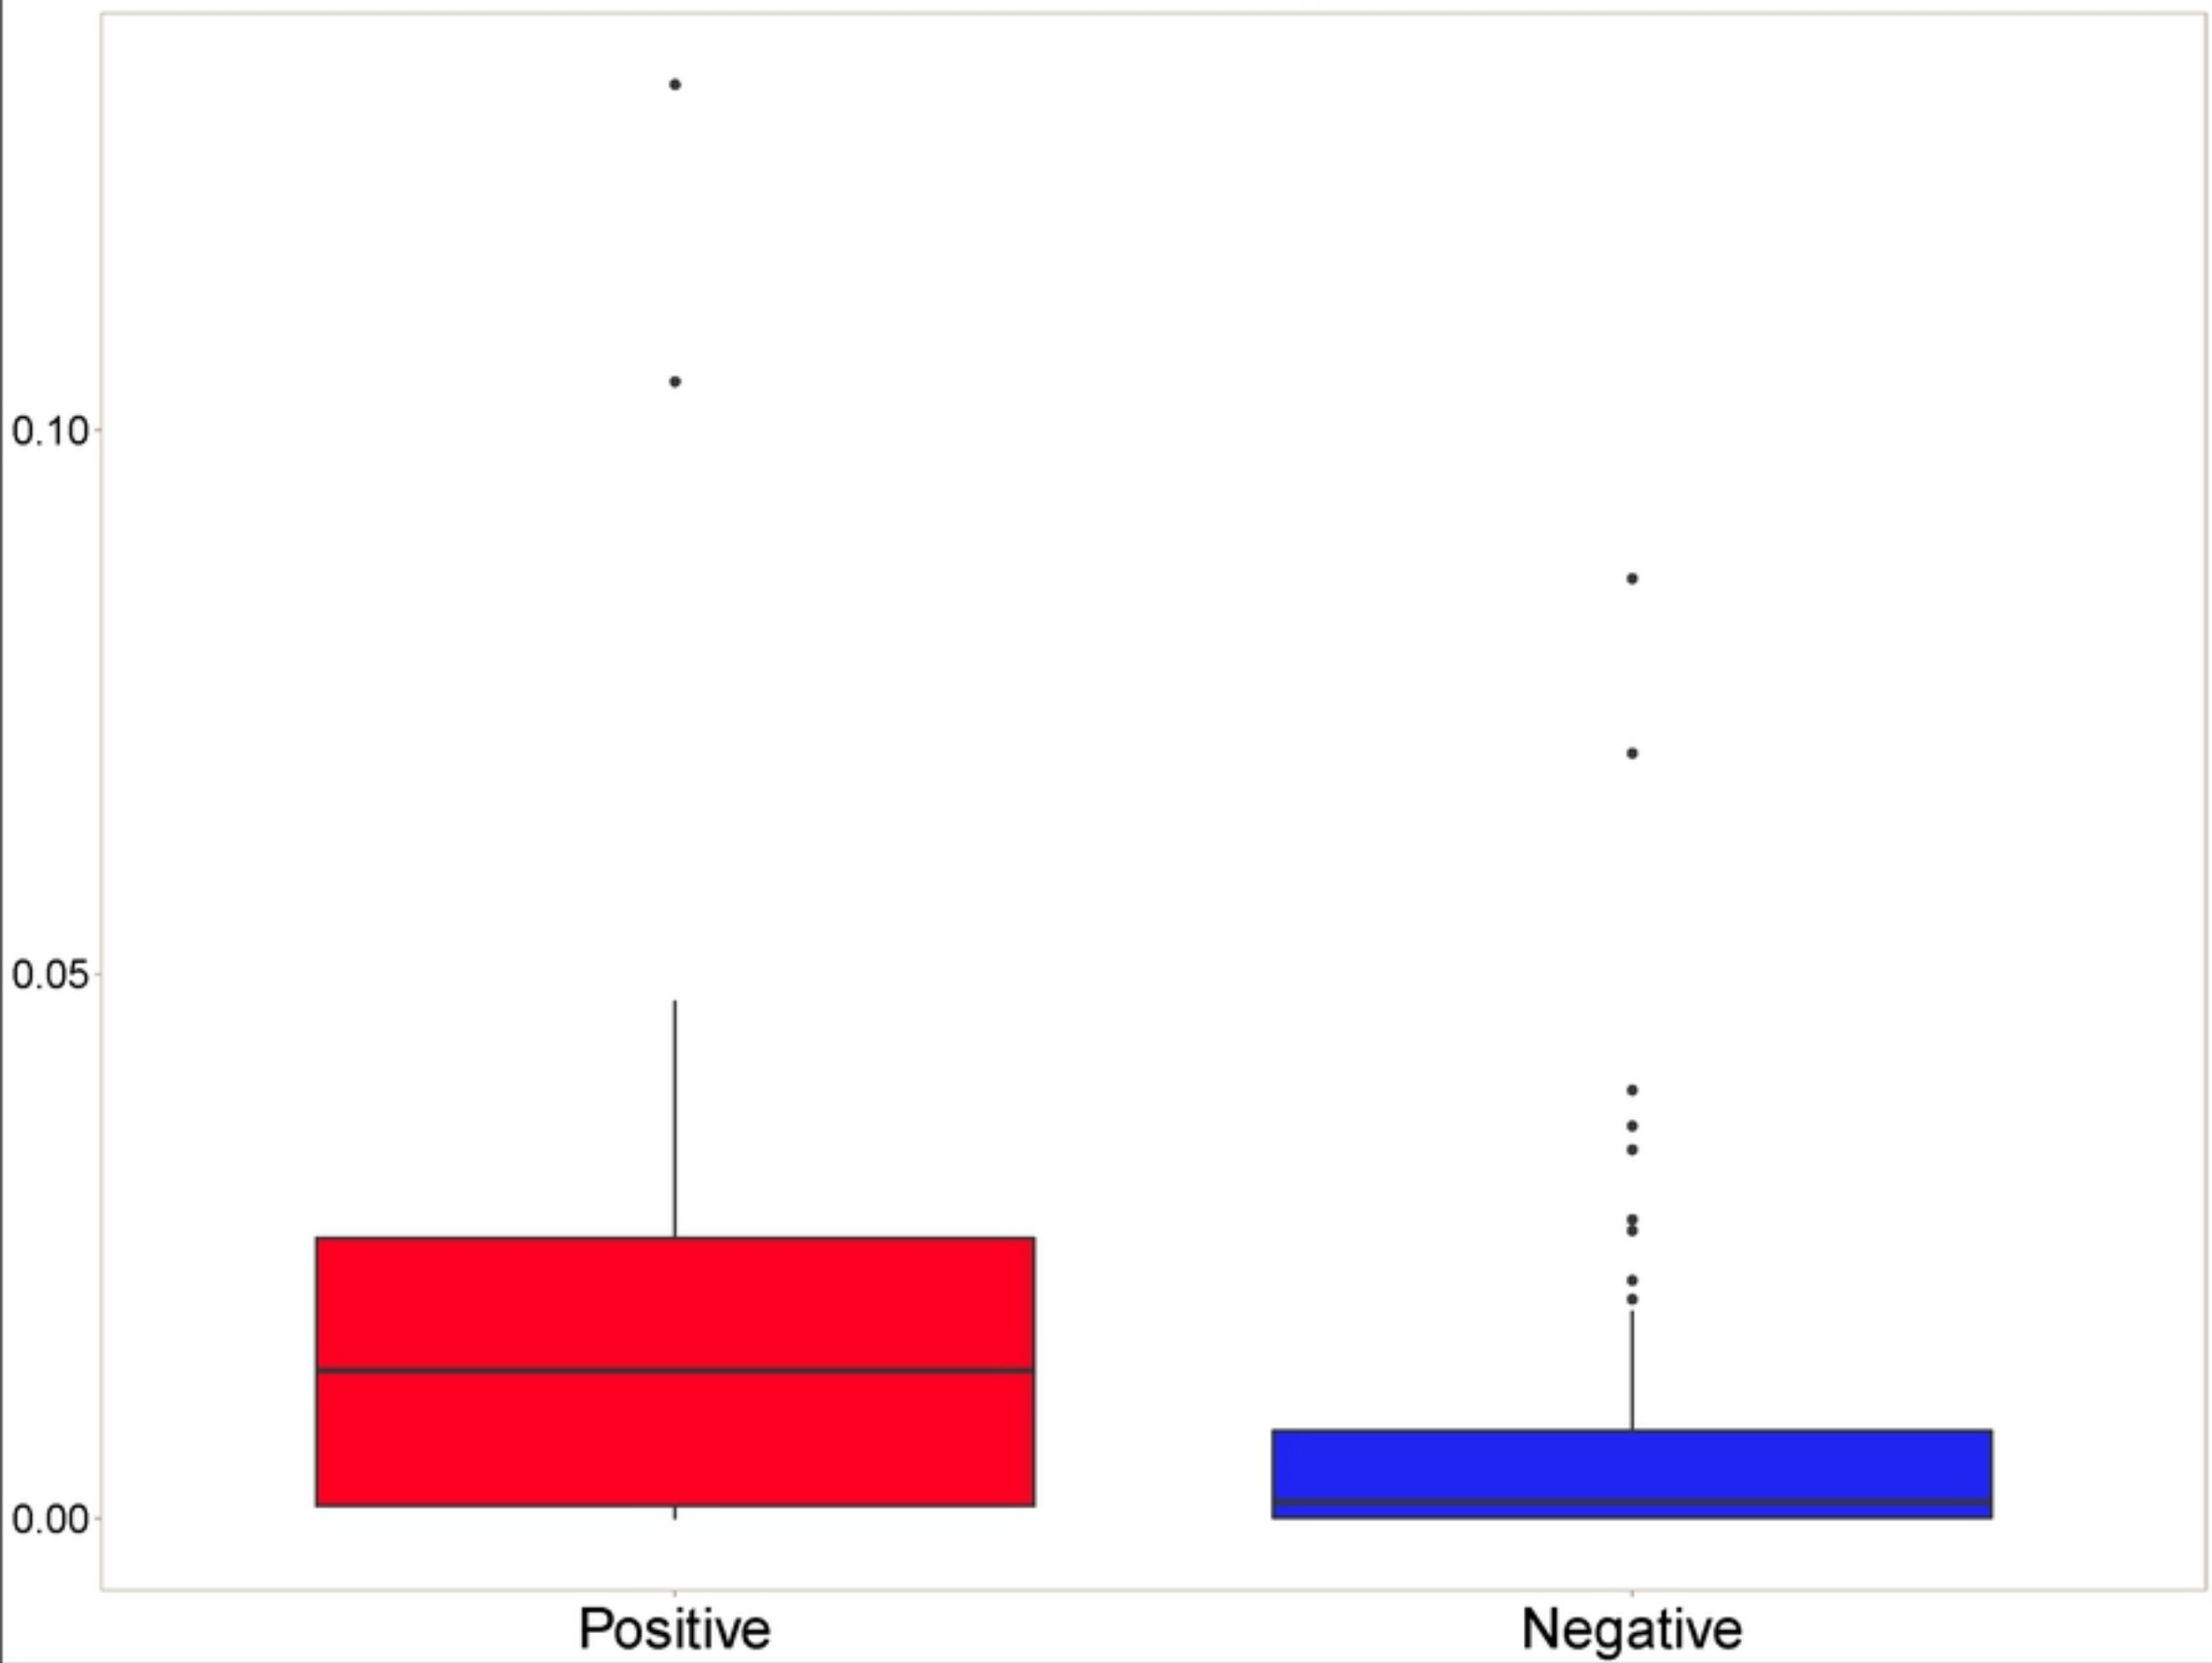

Figure

Ruminococcus gnavus group

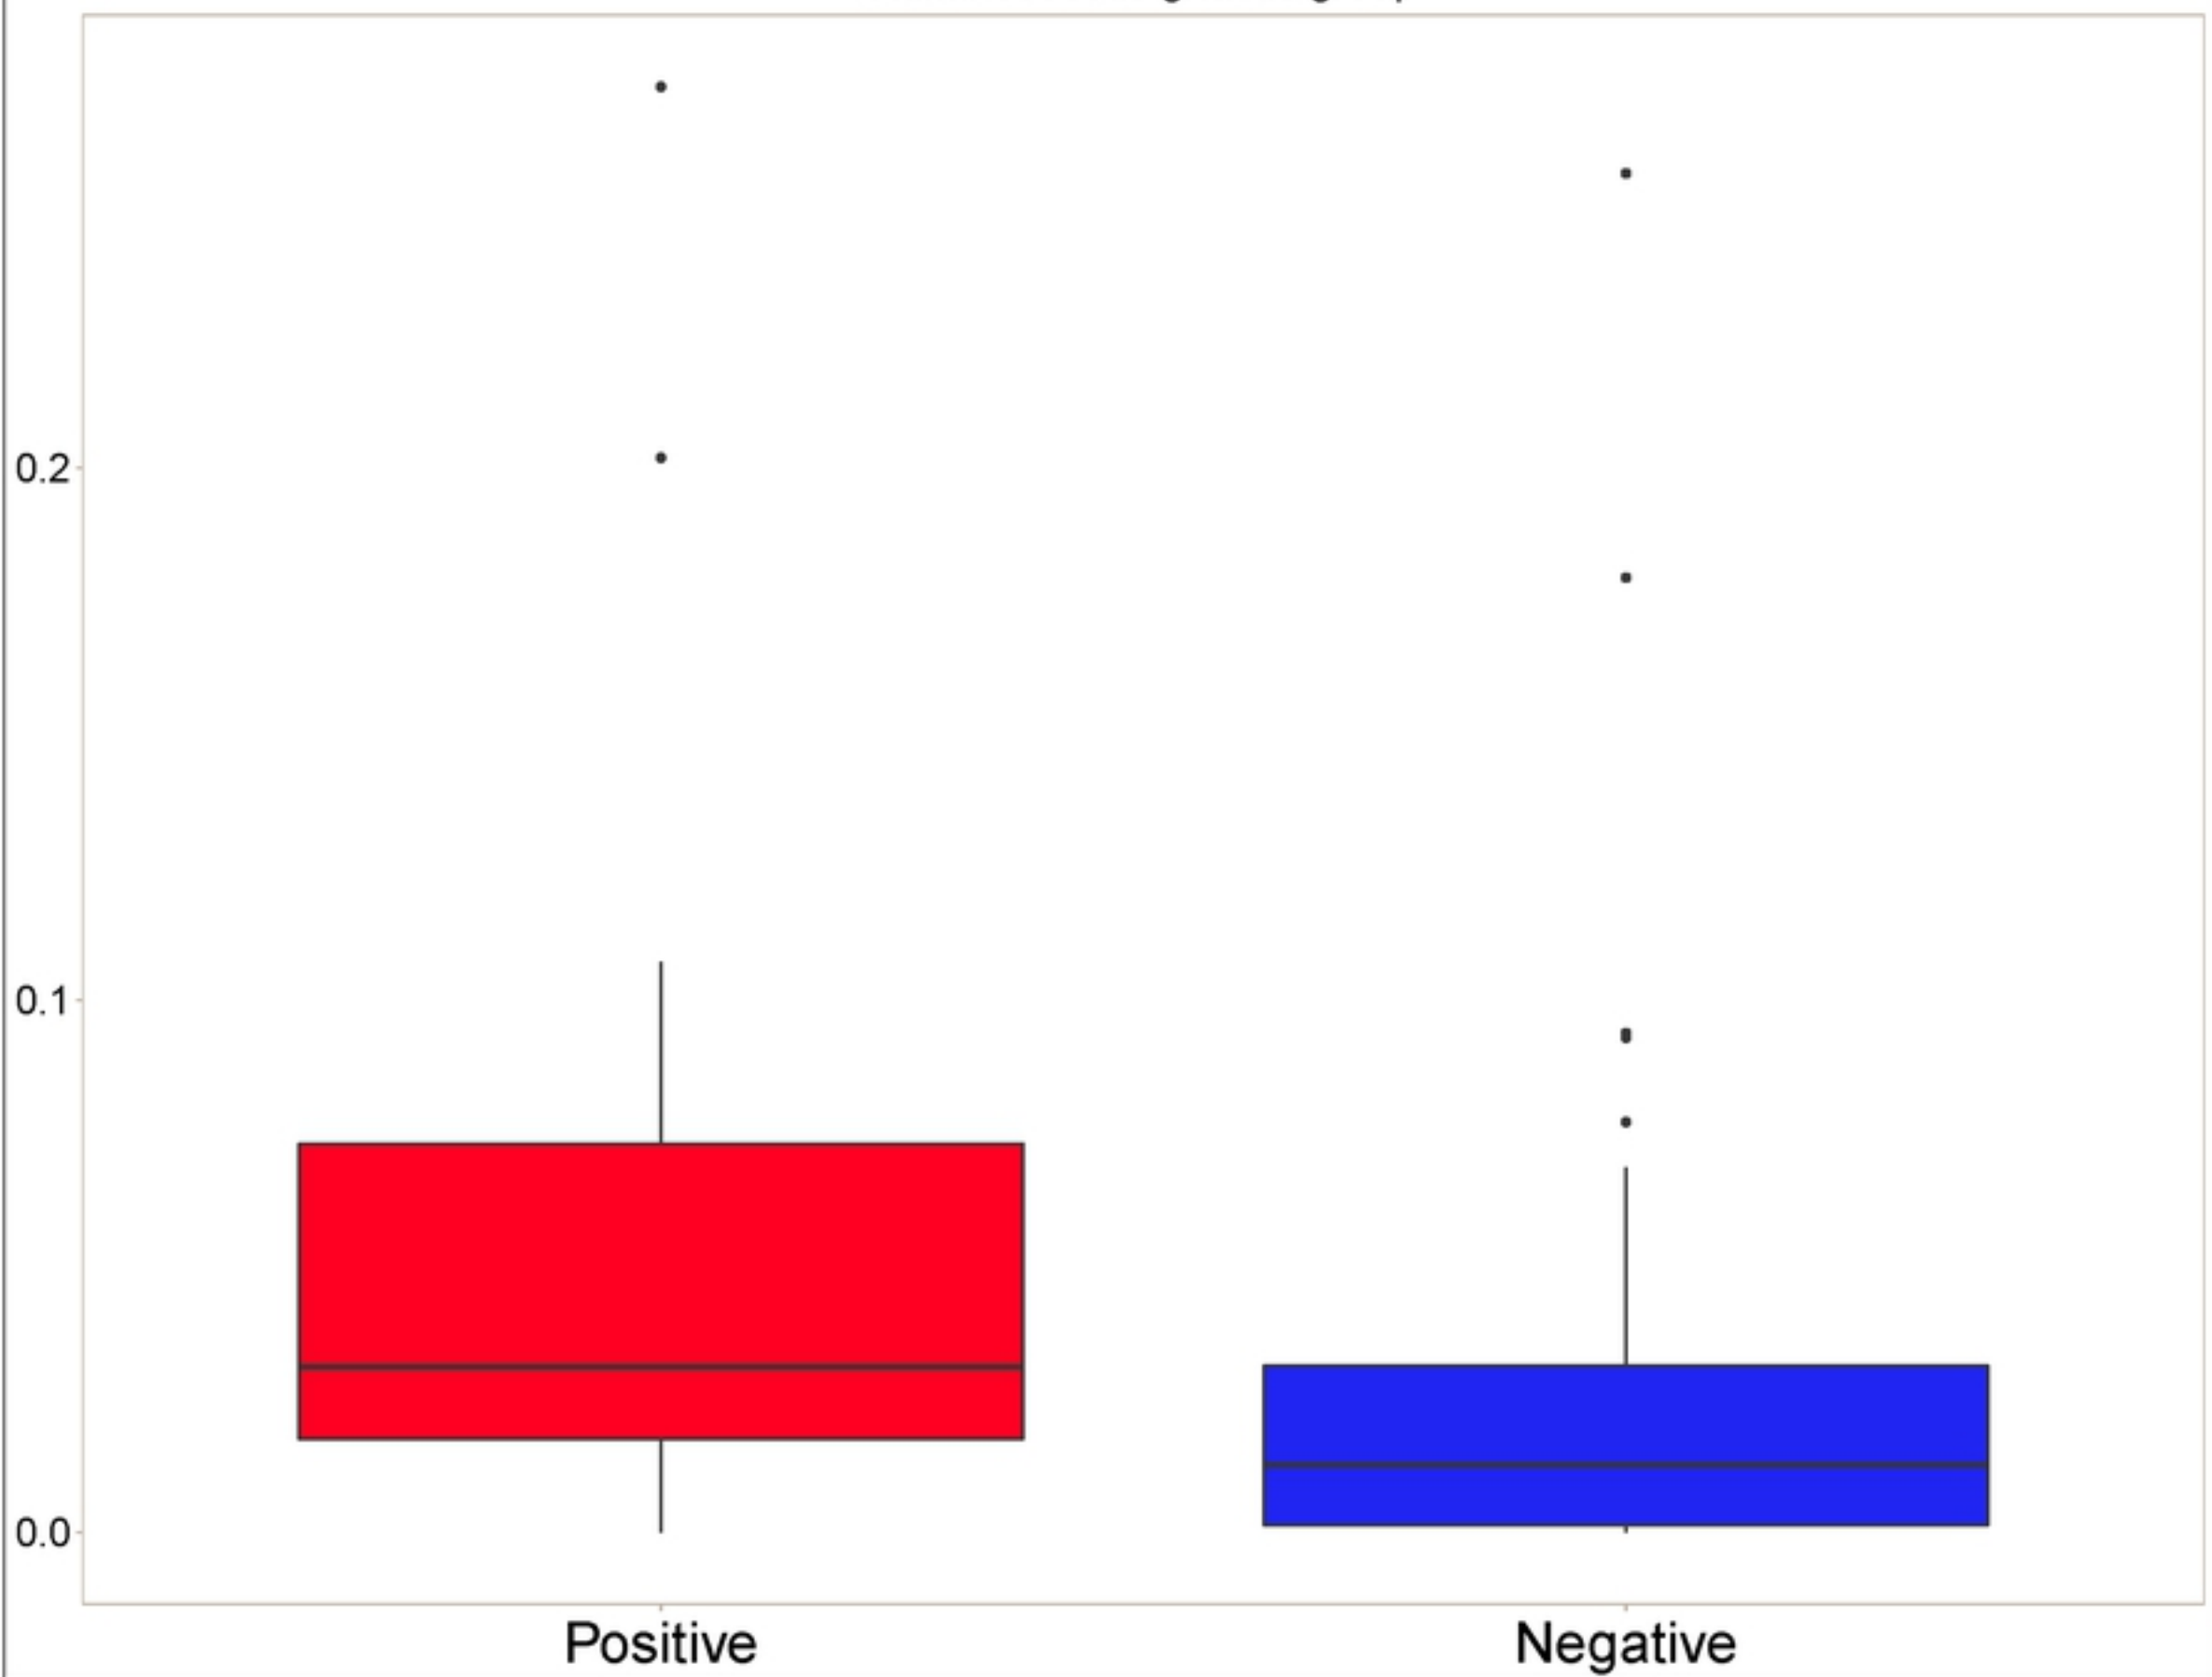

Figure
